# Supplementary material for: Phylogeny of the species-rich Pilea Lindl. (Urticaceae) supports its revised delimitation and infrageneric classification, including the resurrection of Achudemia Blume
Source: bioRxiv or medRxiv preprint supplement (doi:10.1101/2020.07.01.180109), 2020-07-02
Supplement: Supplementary file [file media-1.pdf]

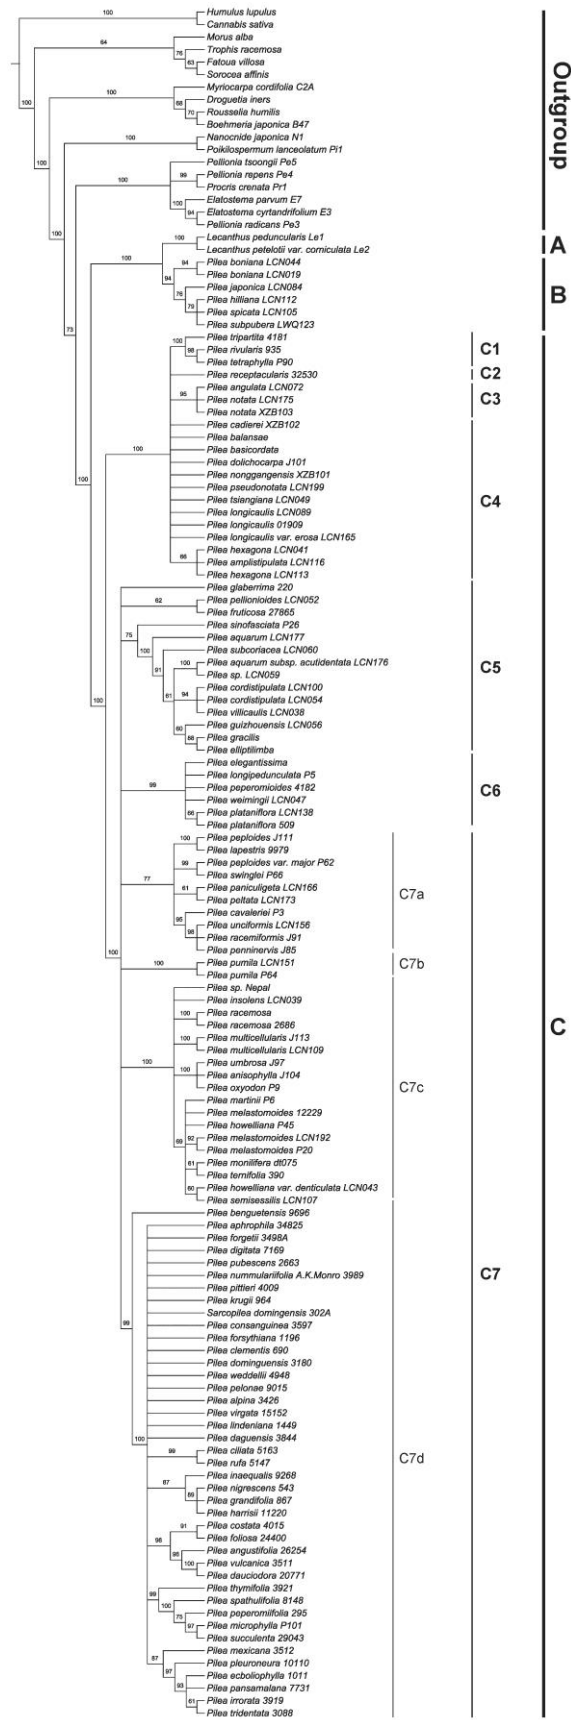

789

790 Fig. S1. Phylogenetic tree of *Pilea* generated from maximum likelihood (ML) of cpDNA dataset  
 791 (*trnL-F* spacer and *rbcL*). Numbers on the branches indicate the bootstrap values ( $\geq 60\%$ ).

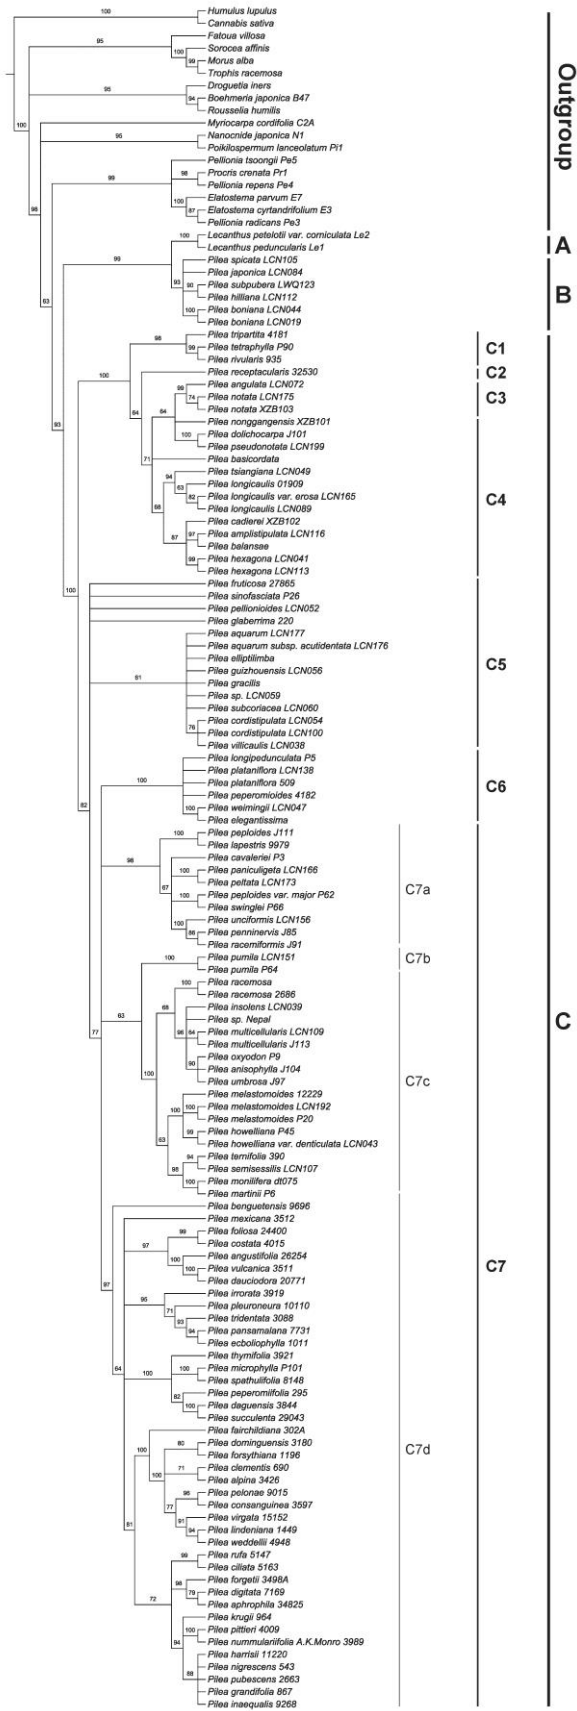

792

793 Fig. S2. Phylogenetic tree of *Pilea* generated from maximum likelihood (ML) of nrDNA dataset  
 794 (nrITS). Numbers on the branches indicate the bootstrap values (≥60%).

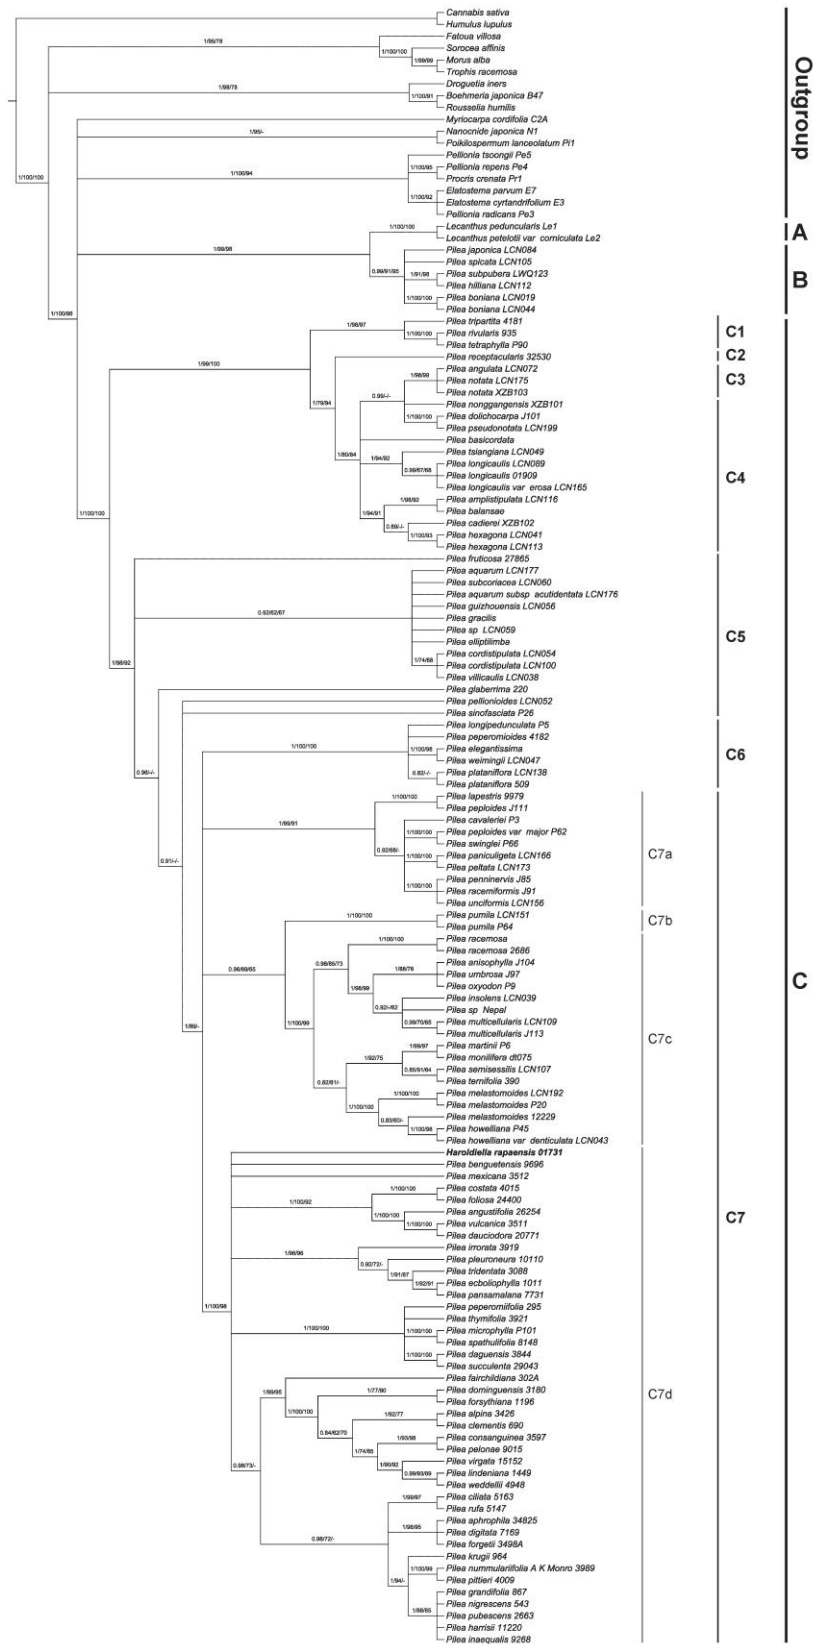

795

796 Fig. S3. Phylogenetic tree of *Pilea* (including *Haroldiella*) generated from Bayesian Inference (BI)  
 797 of nrITS dataset. Numbers on the branches indicate the posterior probability ( $\geq 0.8$ ) of BI and  
 798 bootstrap values ( $\geq 60\%$ ) of the maximum likelihood (ML) and the maximum parsimony (MP)  
 799 analyses.

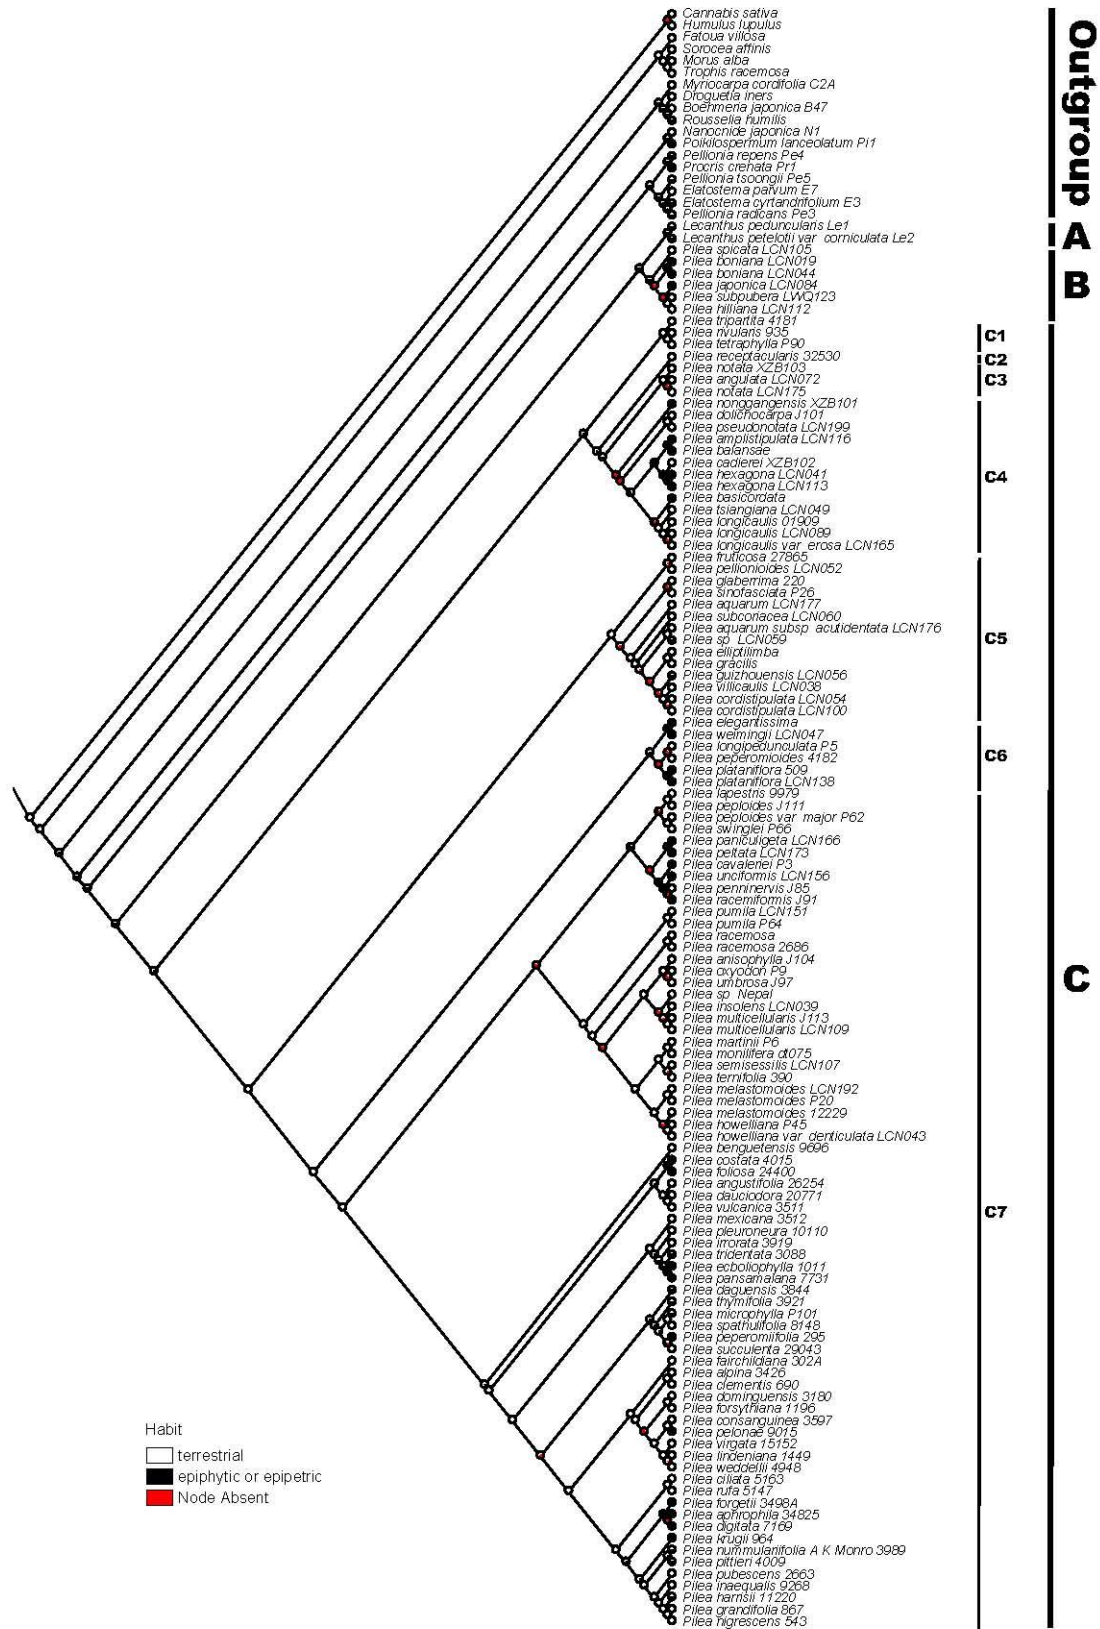

800

801 Fig. S4. Ancestral state reconstruction for *Pilea* based on Maximum likelihood analysis of habit.

802

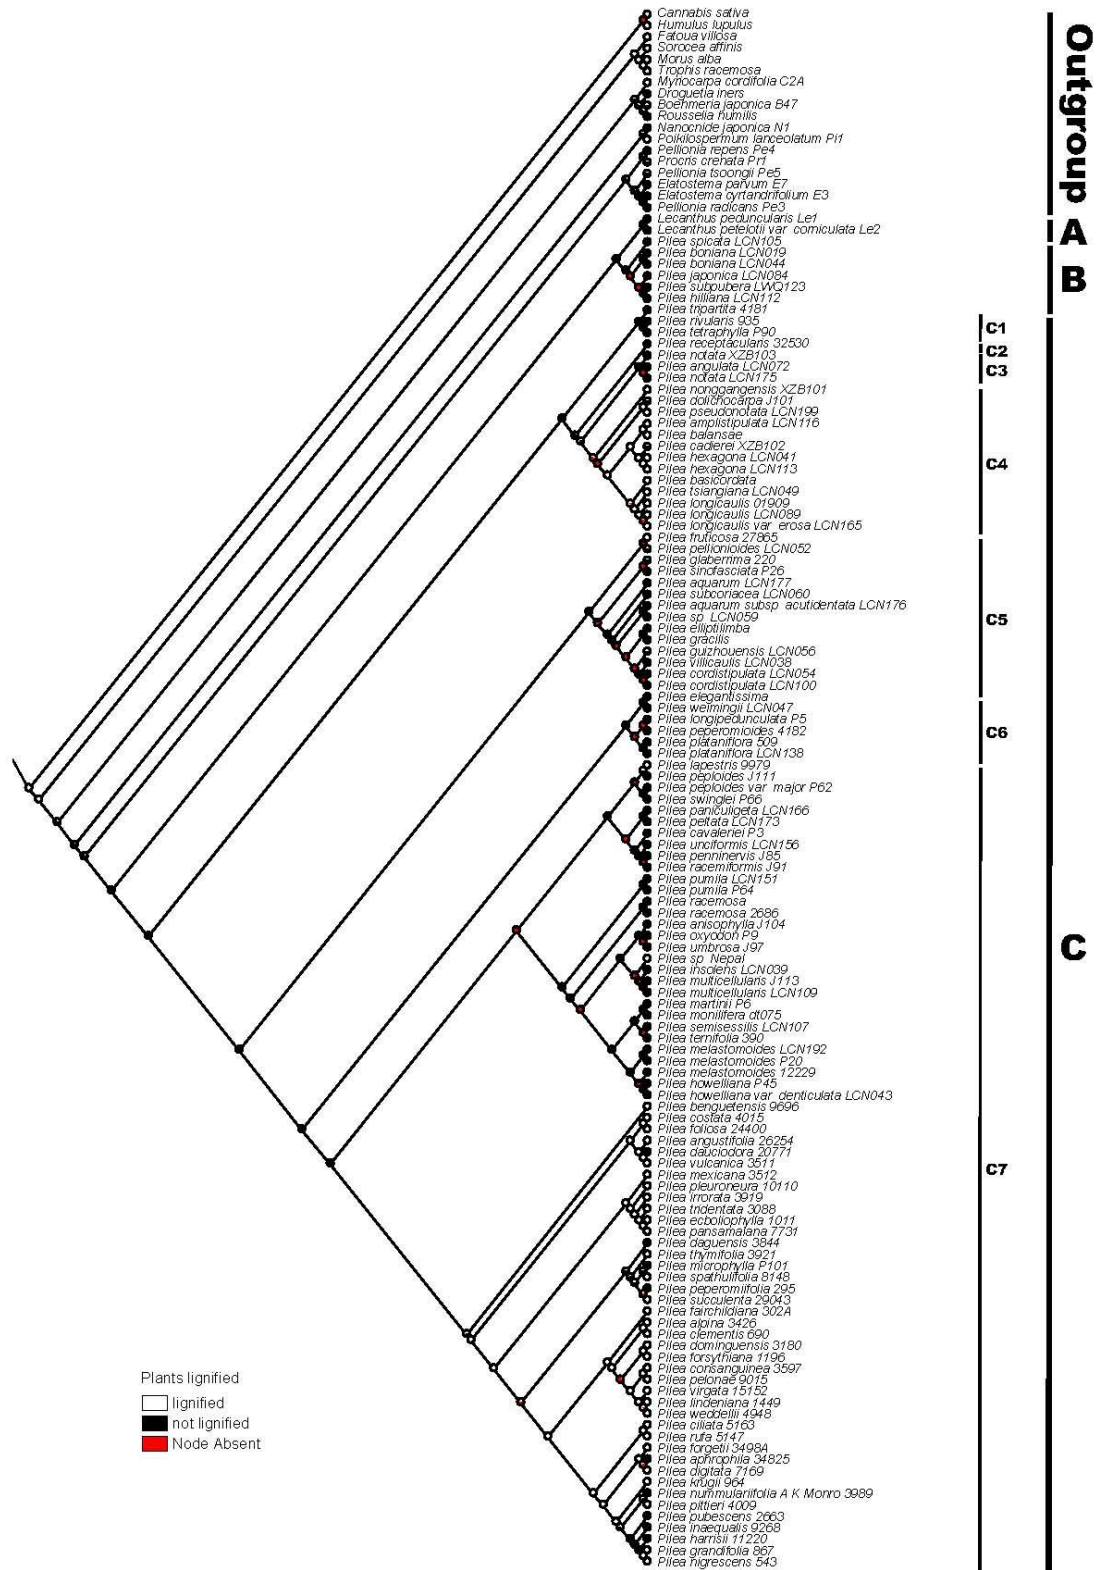

803

804 Fig. S5. Ancestral state reconstruction for *Pilea* based on Maximum likelihood analysis of plants  
 805 lignified.

806

807

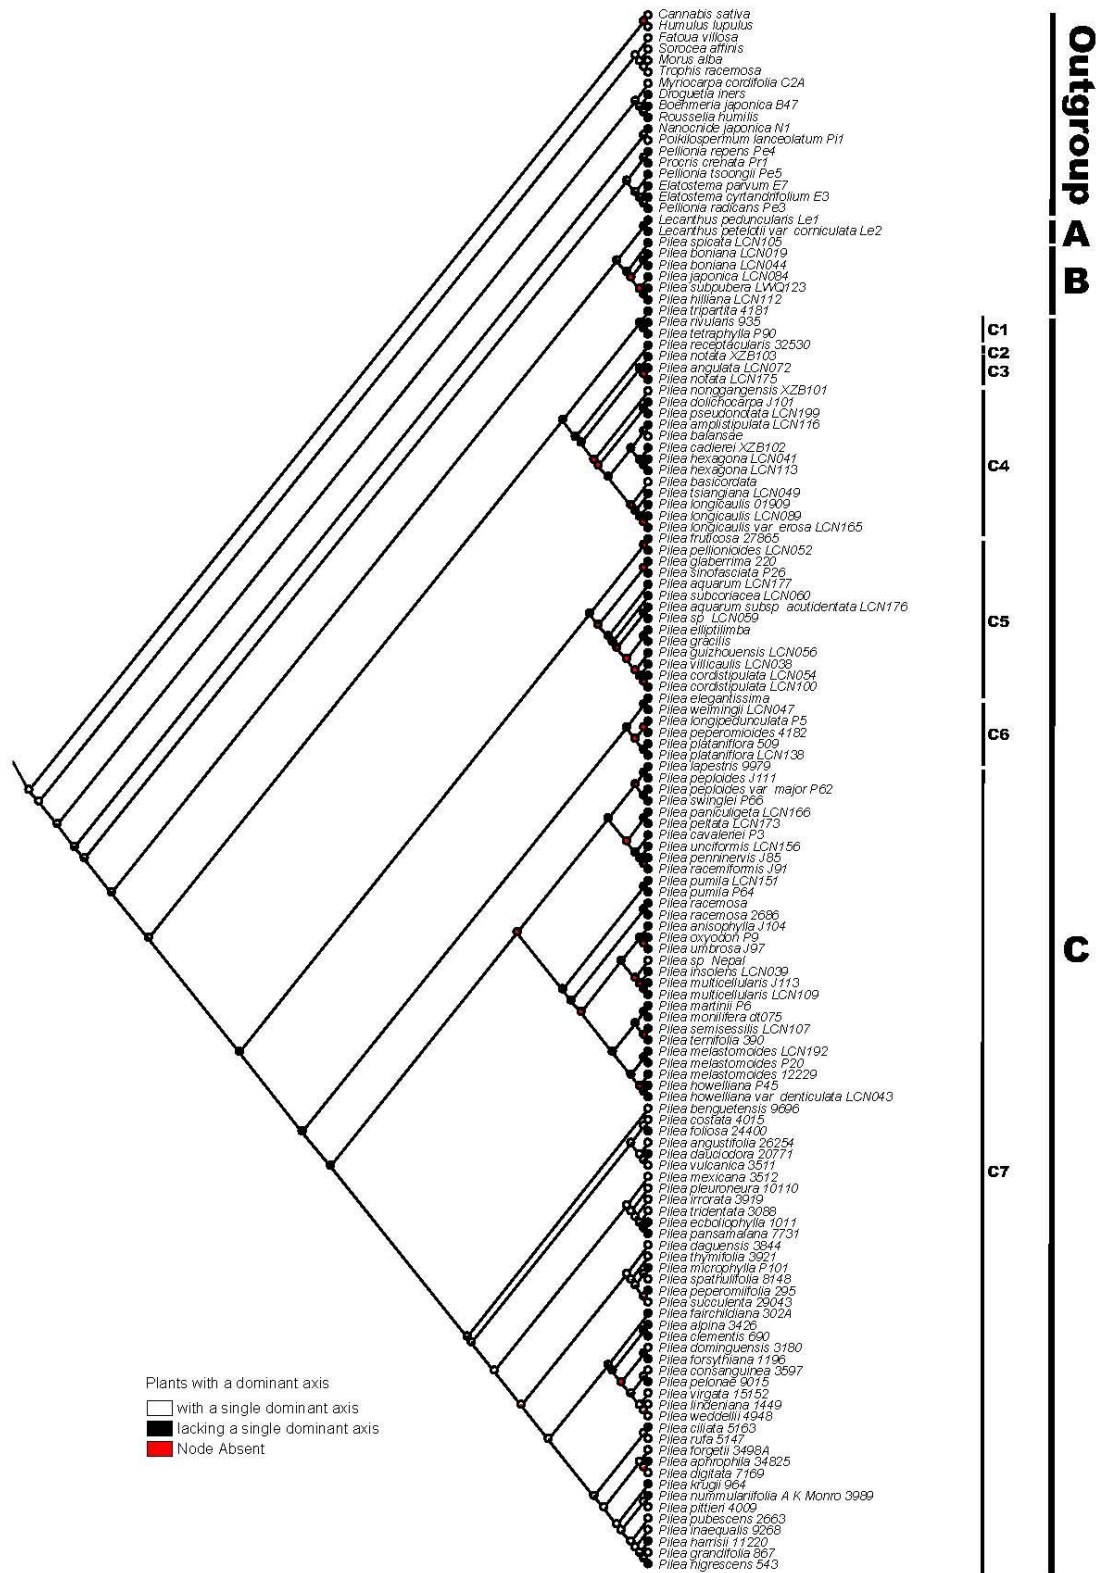

808

809 Fig. S6. Ancestral state reconstruction for *Pilea* based on Maximum likelihood analysis of plants  
 810 with a dominant axis.

811

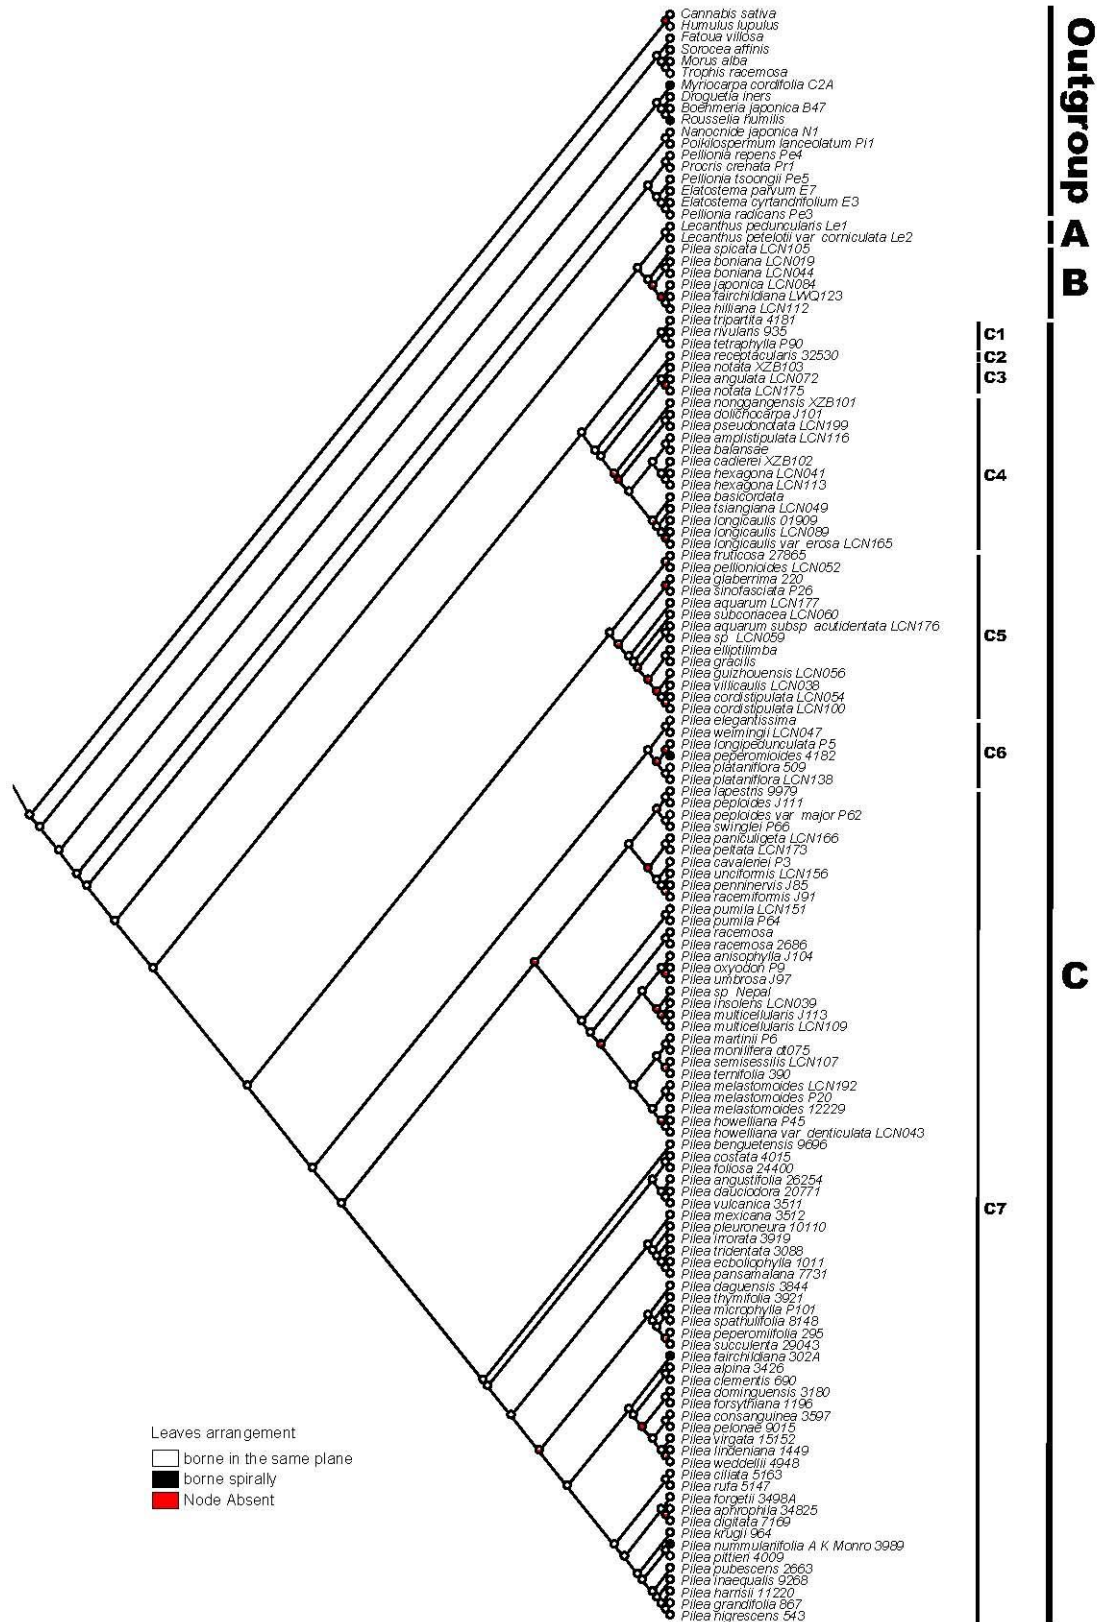

812

813 Fig. S7. Ancestral state reconstruction for *Pilea* based on Maximum likelihood analysis of leaves  
 814 arrangement.

815

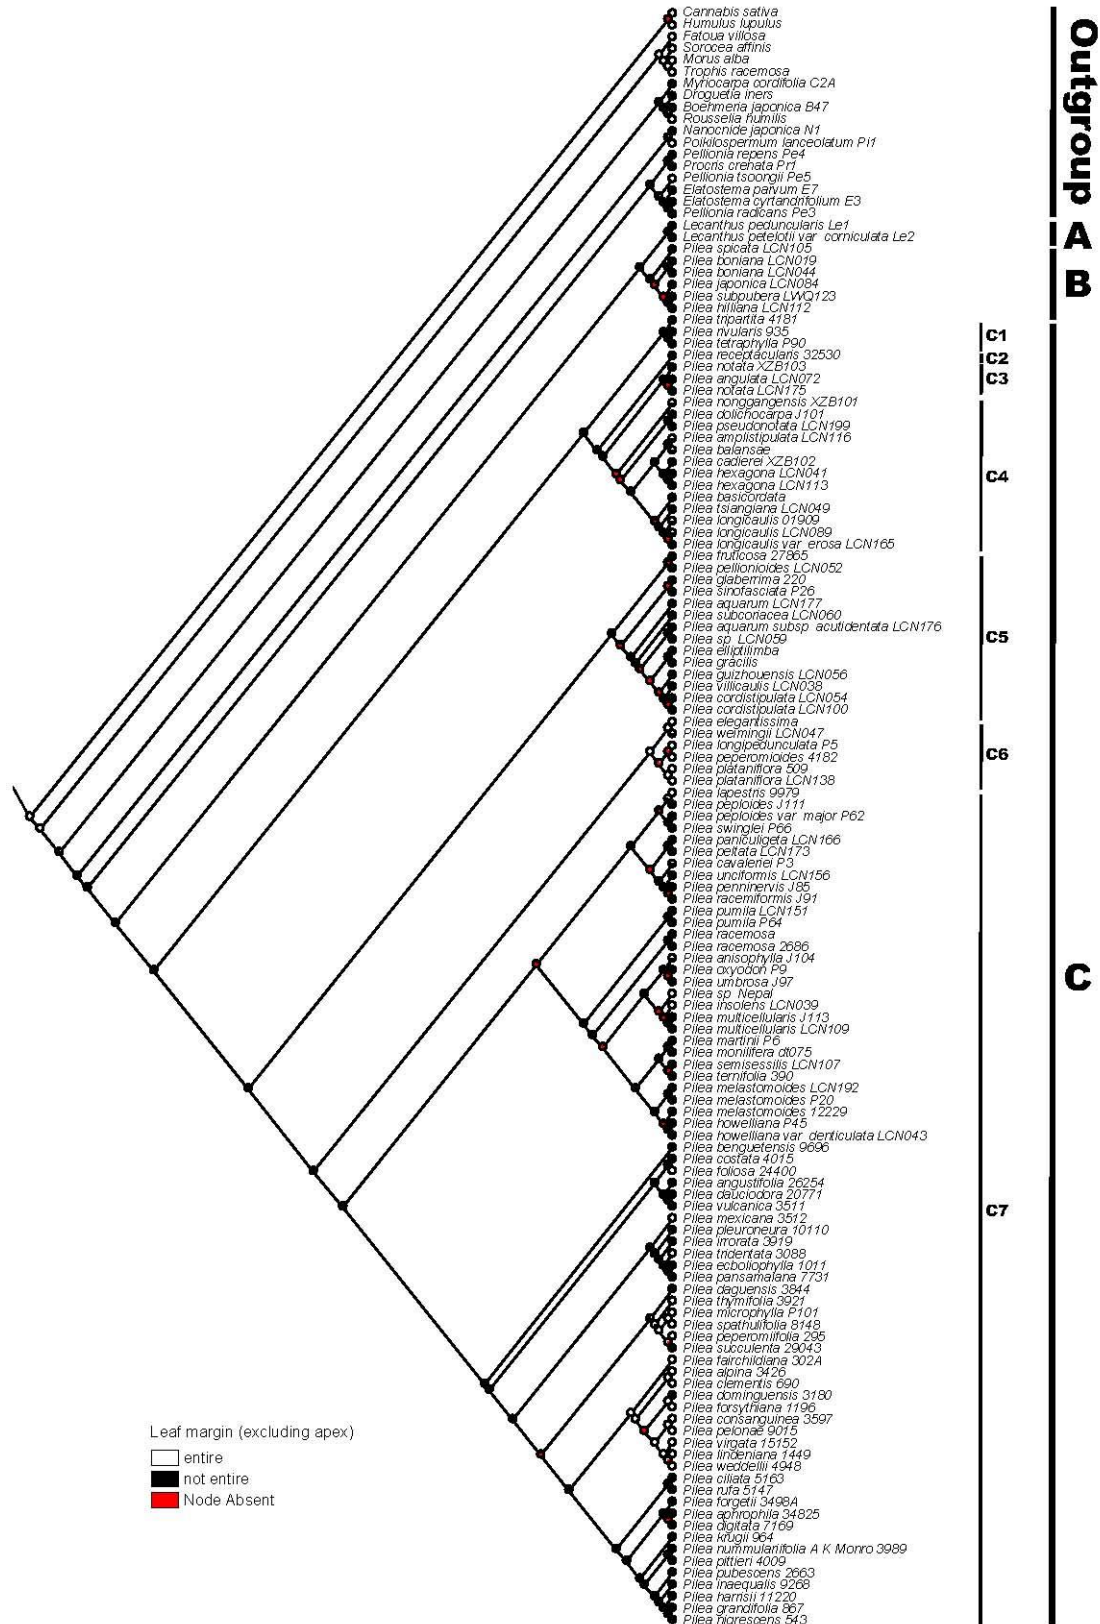

Outgroup A B C

C1  
C2  
C3  
C4  
C5  
C6  
C7

Leaf margin (excluding apex)  
 ○ entire  
 ● not entire  
 ● Node Absent

816

817 Fig. S8. Ancestral state reconstruction for *Pilea* based on Maximum likelihood analysis of leaf  
 818 margin (excluding apex).

819



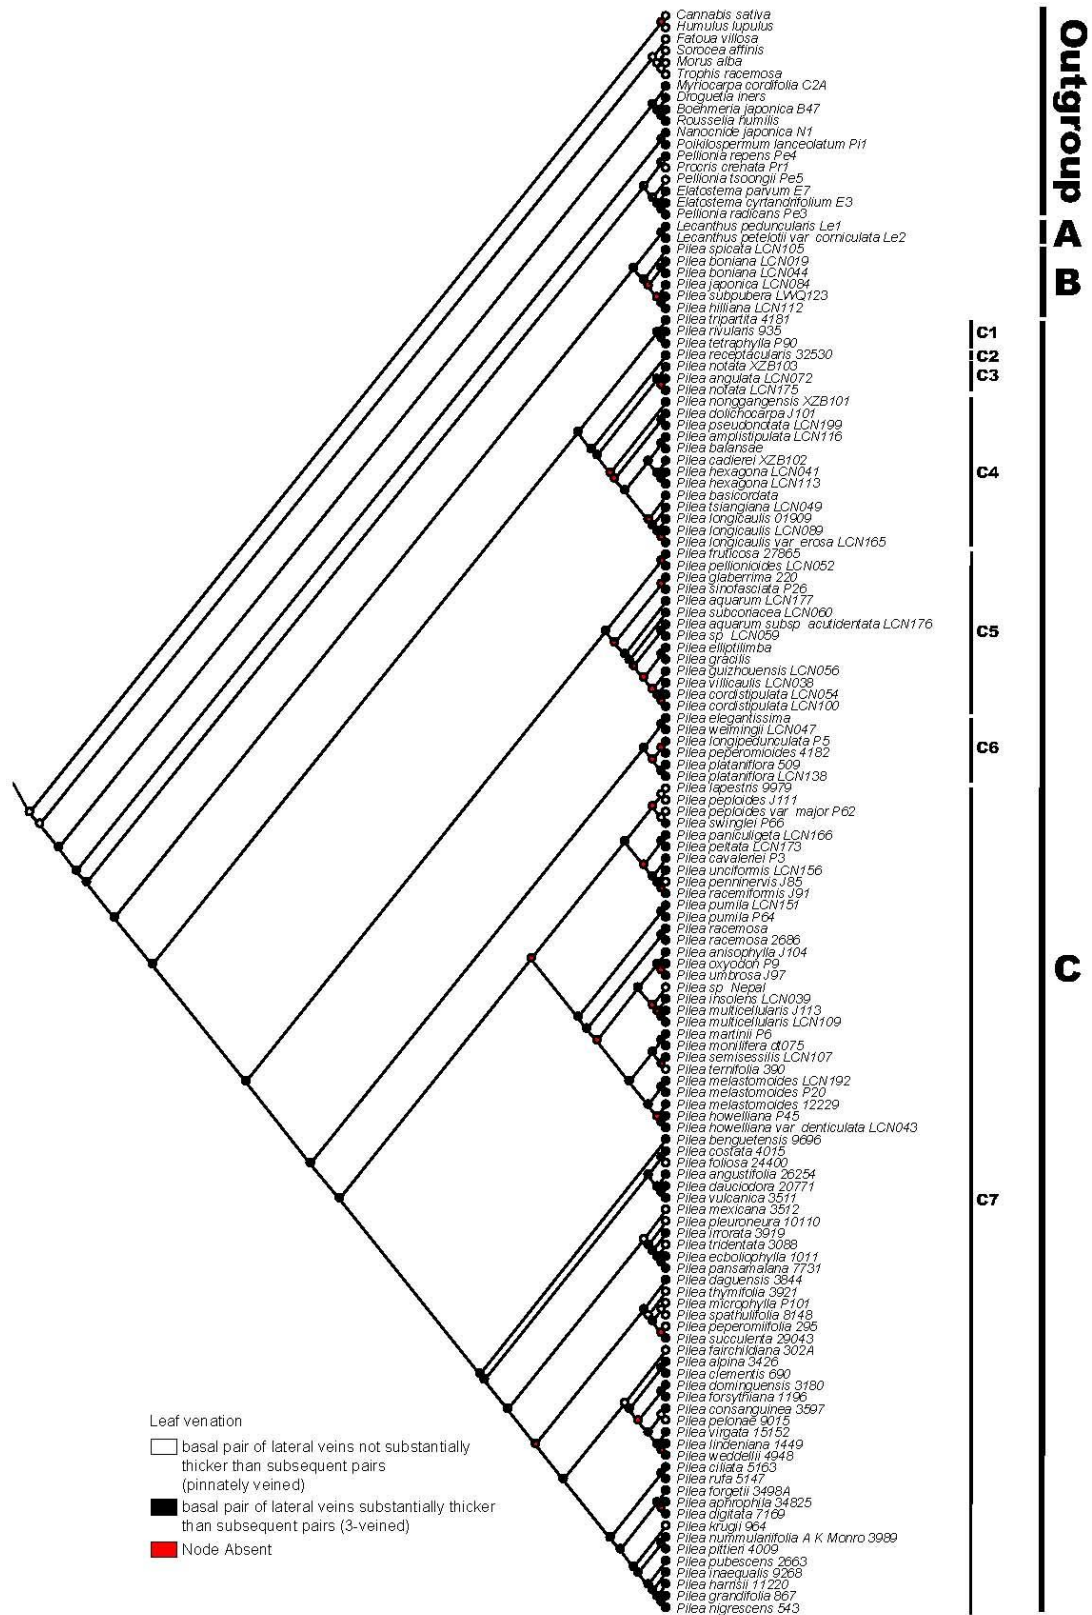

820

821 Fig. S9. Ancestral state reconstruction for *Pilea* based on Maximum likelihood analysis of leaf  
822 venation.

823

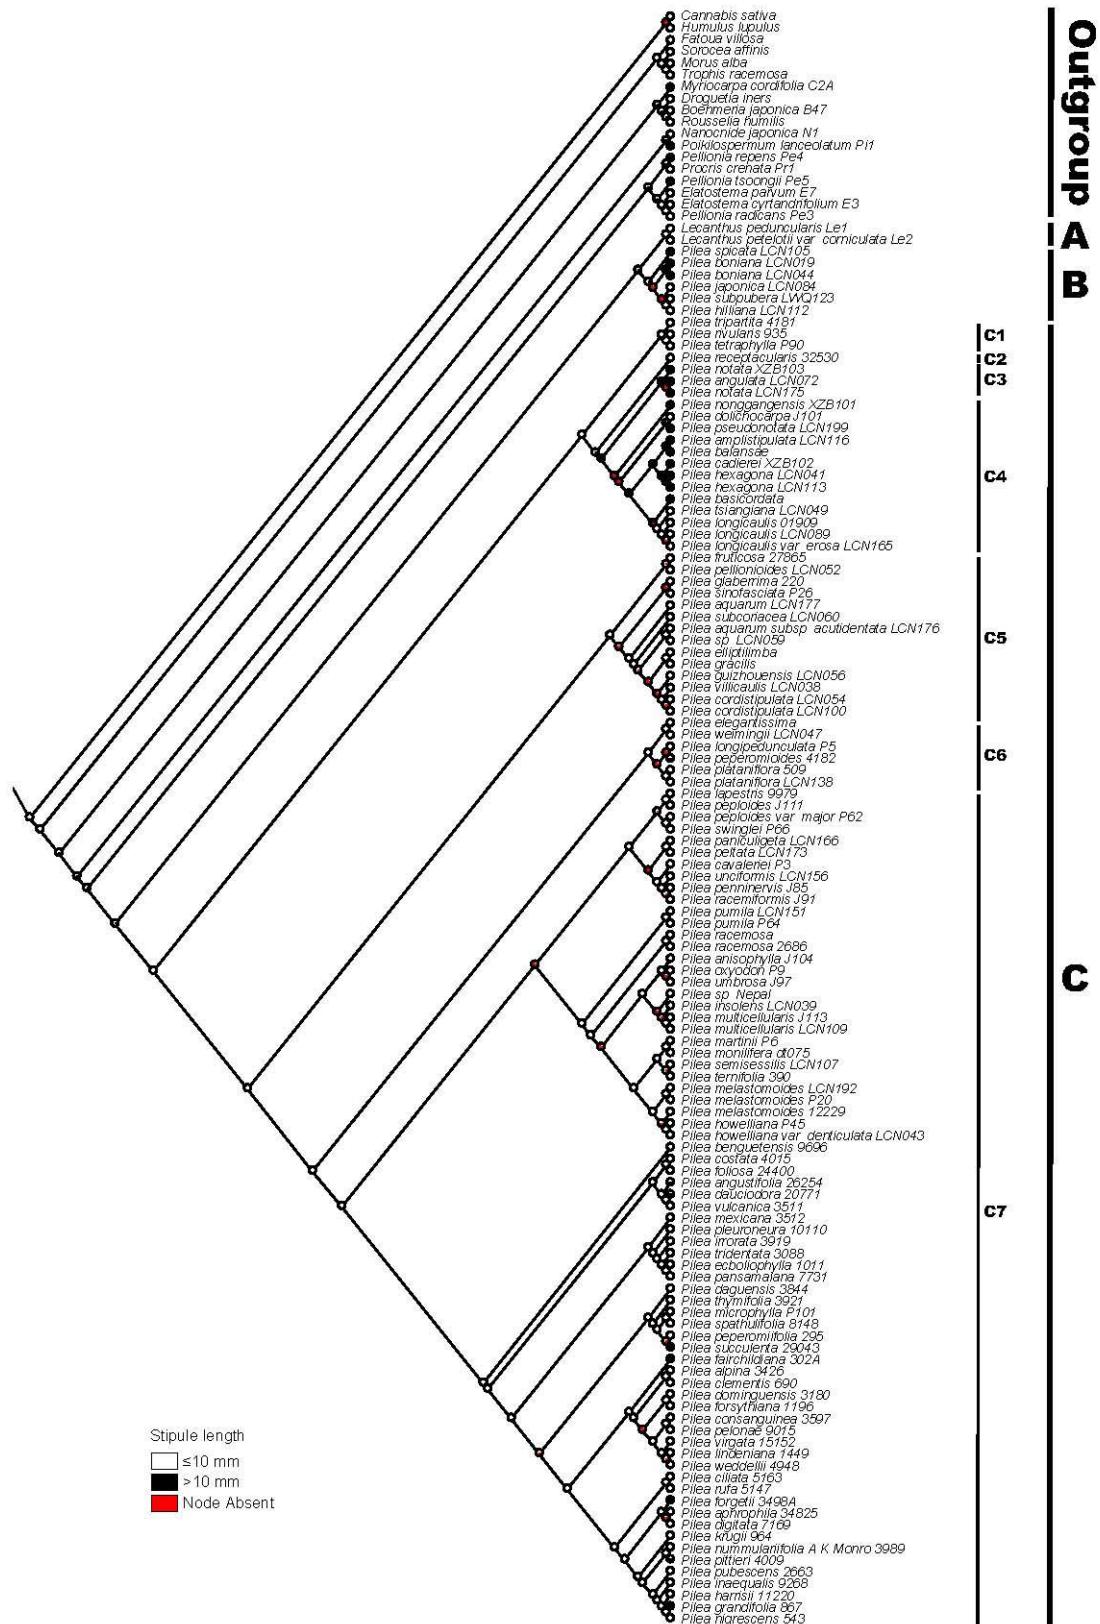

824

825 Fig. S10. Ancestral state reconstruction for *Pilea* based on Maximum likelihood analysis of stipule

826 length.

827

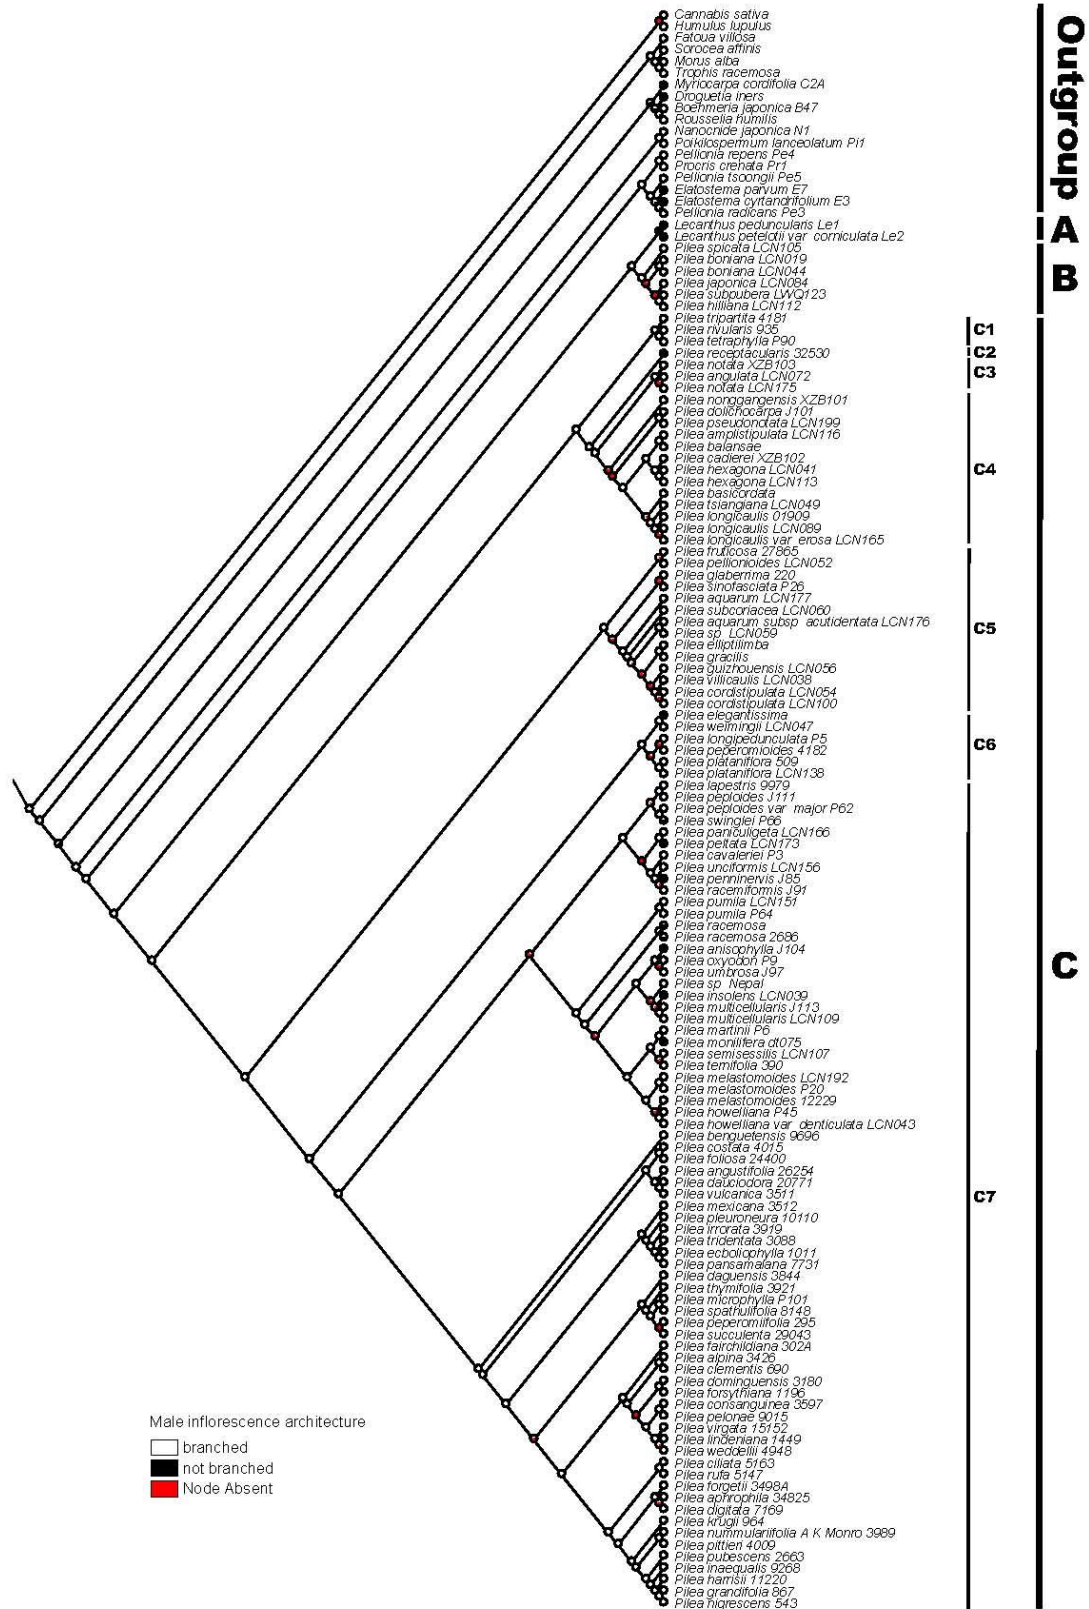

828

829 Fig. S11. Ancestral state reconstruction for *Pilea* based on Maximum likelihood analysis of male  
 830 inflorescence architecture.

831

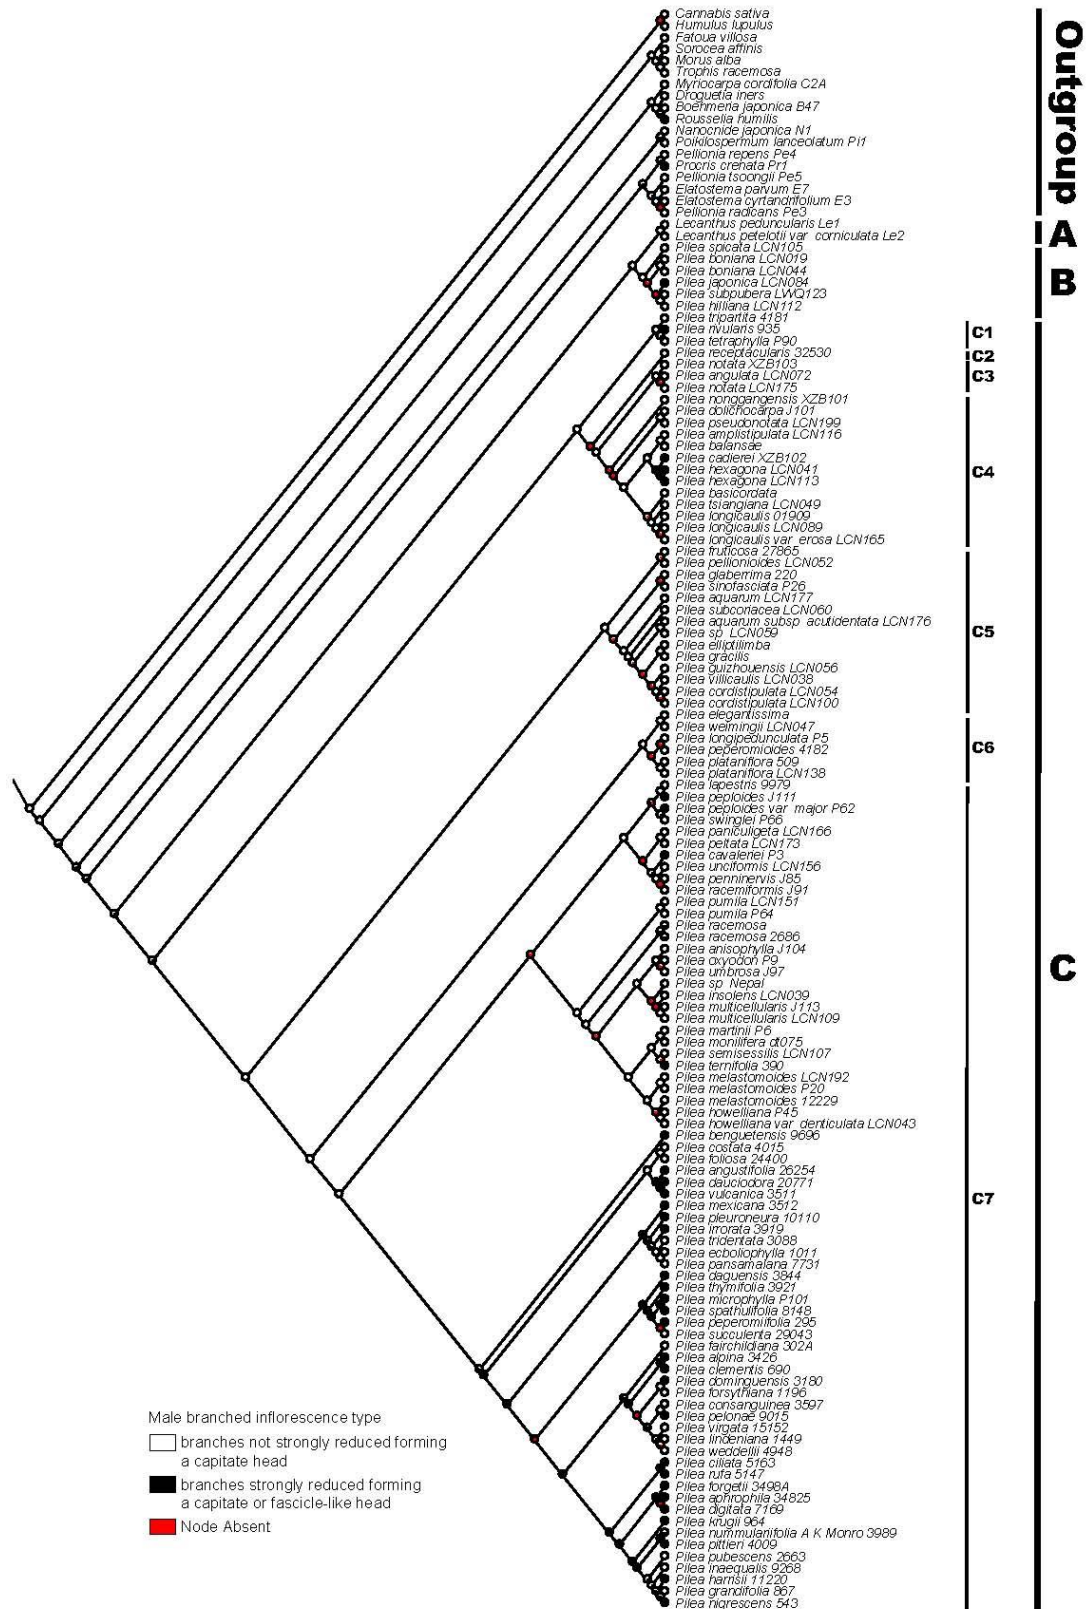

832

833 Fig. S12. Ancestral state reconstruction for *Pilea* based on Maximum likelihood analysis of male  
 834 branched inflorescence type.

835

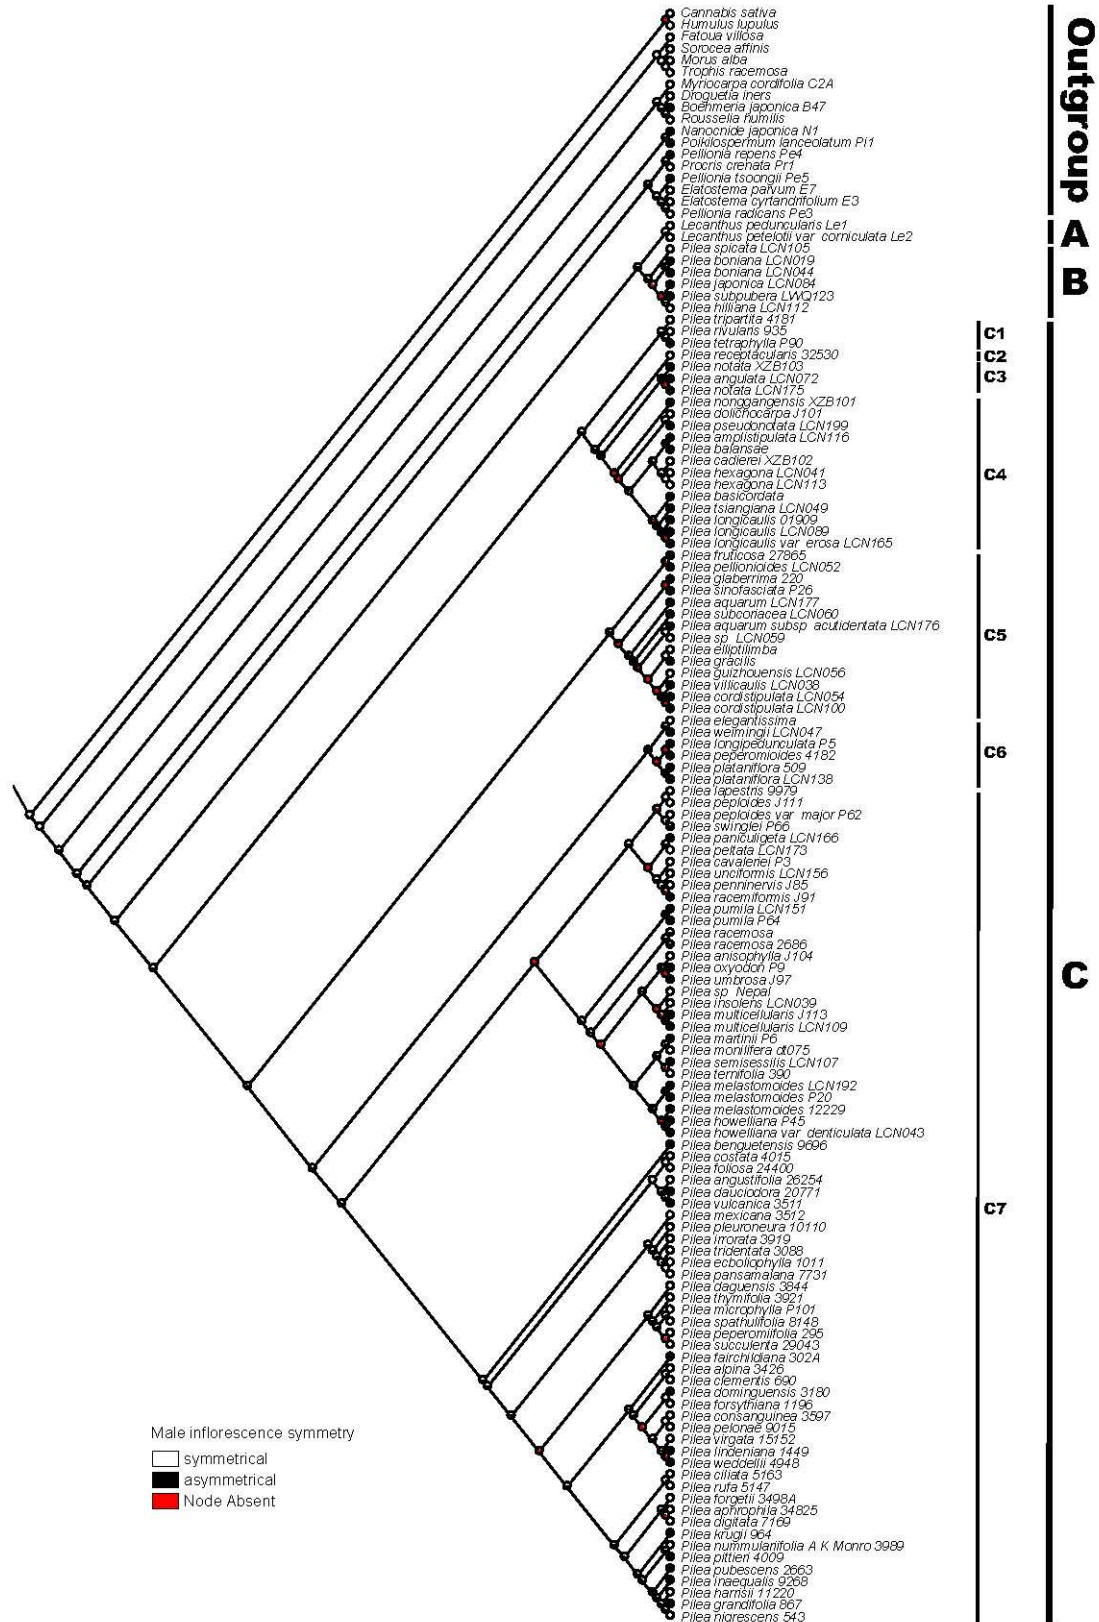

836

837 Fig. S13. Ancestral state reconstruction for *Pilea* based on Maximum likelihood analysis of male  
 838 inflorescence symmetry.

839

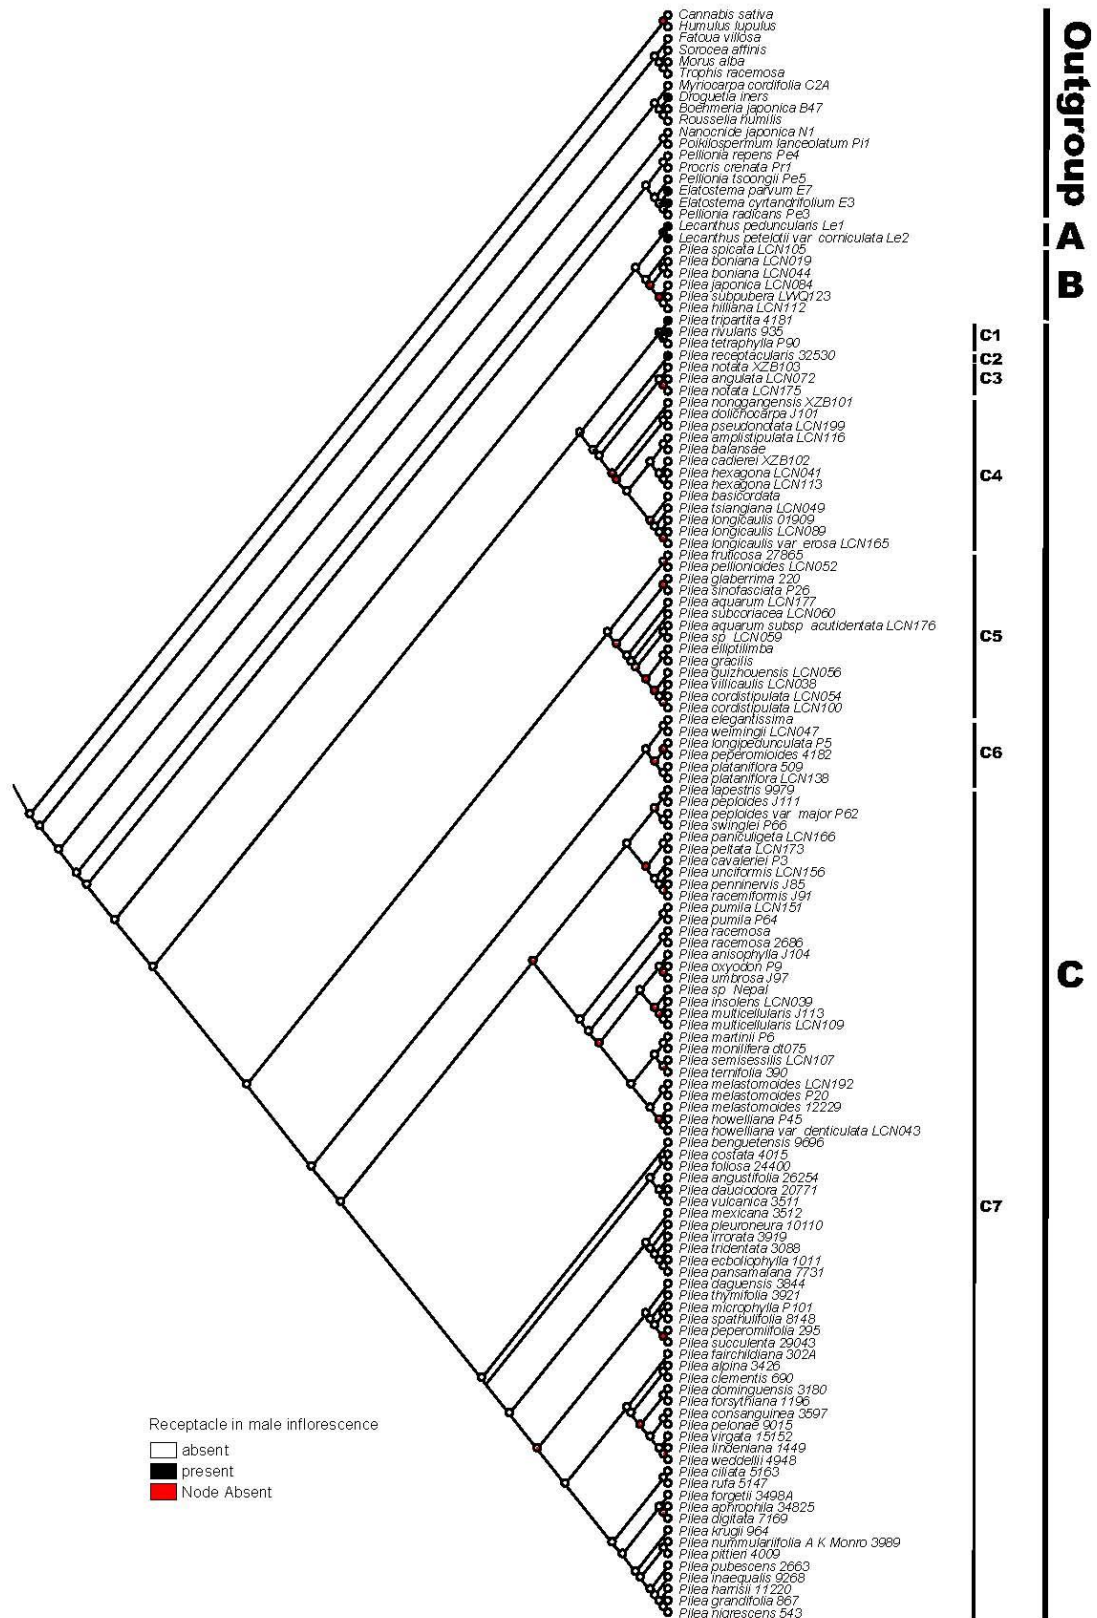

840

841 Fig. S14. Ancestral state reconstruction for *Pilea* based on Maximum likelihood analysis of  
 842 receptacle in male inflorescence.

843

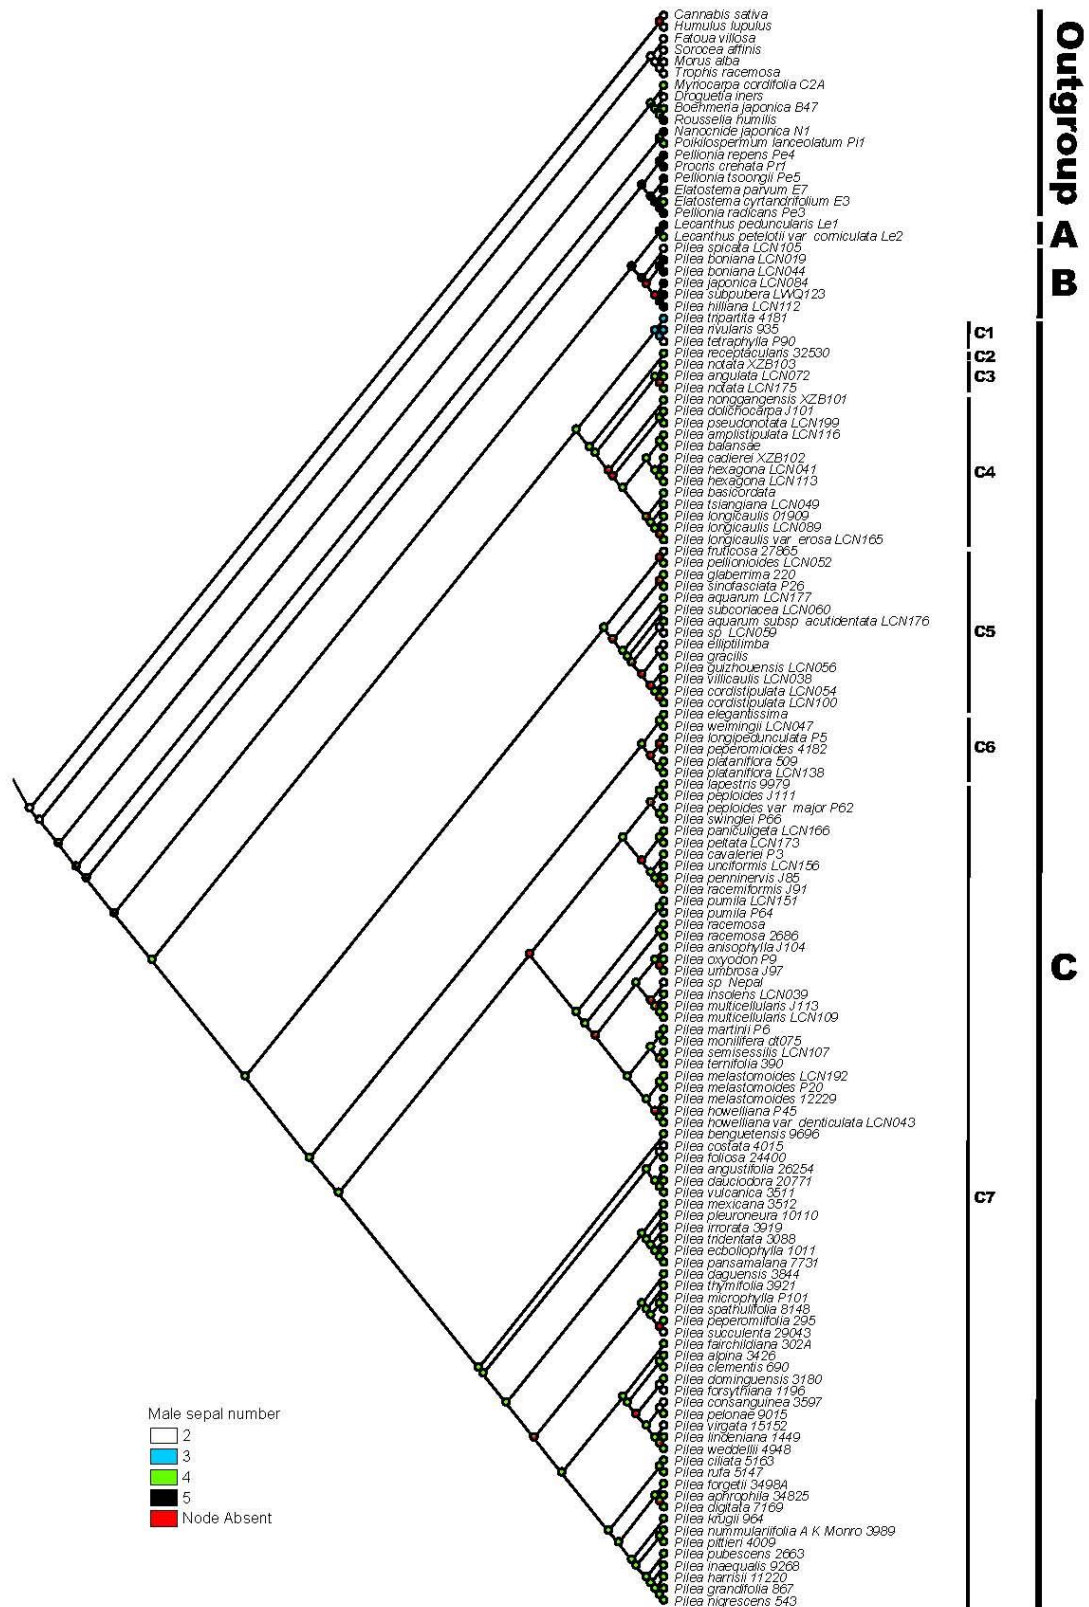

844

845 Fig. S15. Ancestral state reconstruction for *Pilea* based on Maximum likelihood analysis of male  
846 sepal number.

847

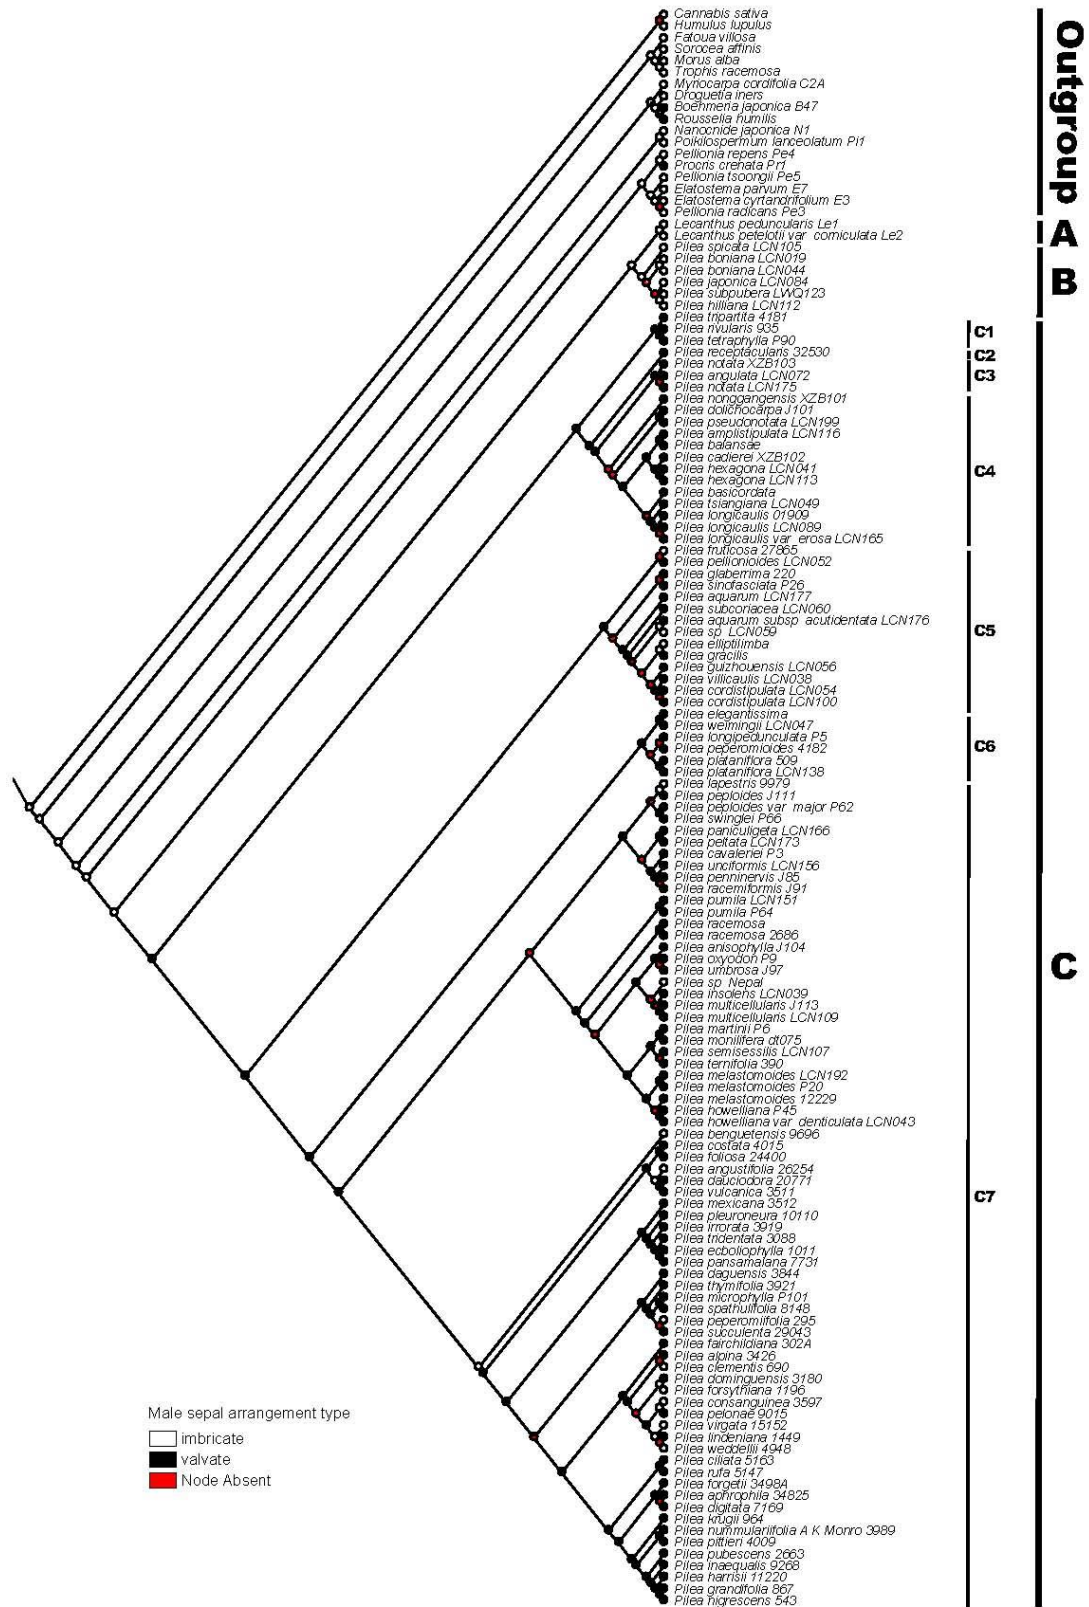

848

849 Fig. S16. Ancestral state reconstruction for *Pilea* based on Maximum likelihood analysis of male  
850 sepal arrangement type.

851



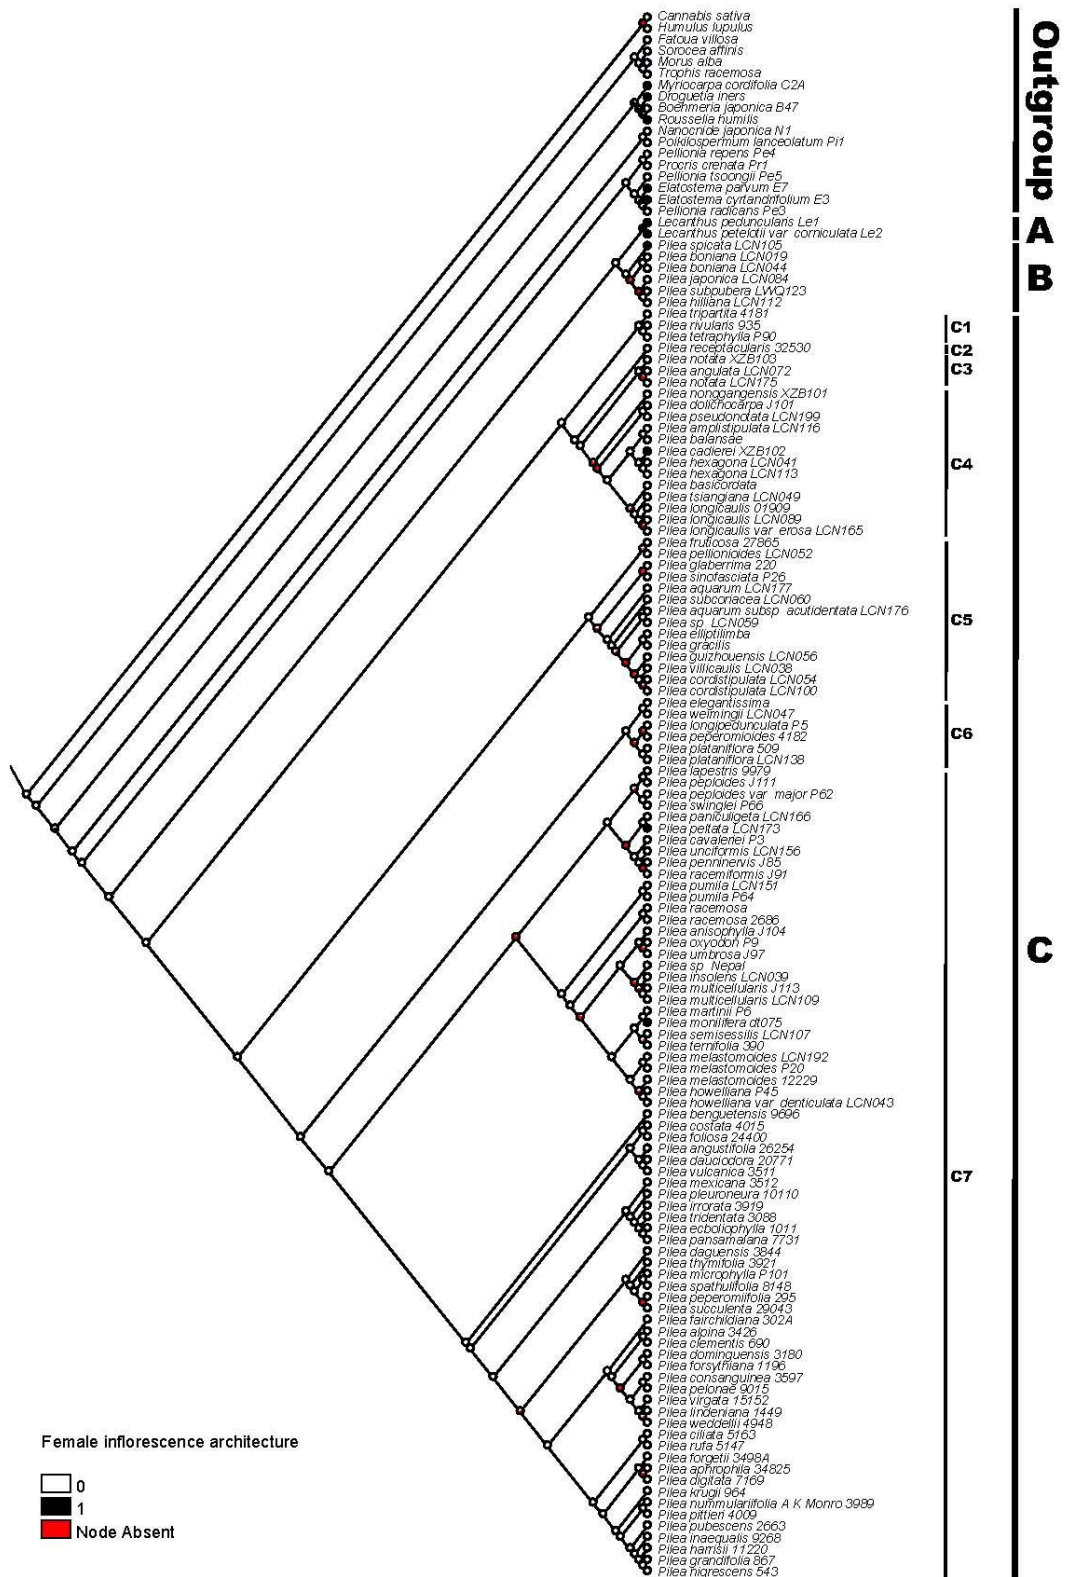

852

853 Fig. S17. Ancestral state reconstruction for *Pilea* based on Maximum likelihood analysis of female  
854 inflorescence architecture.

855

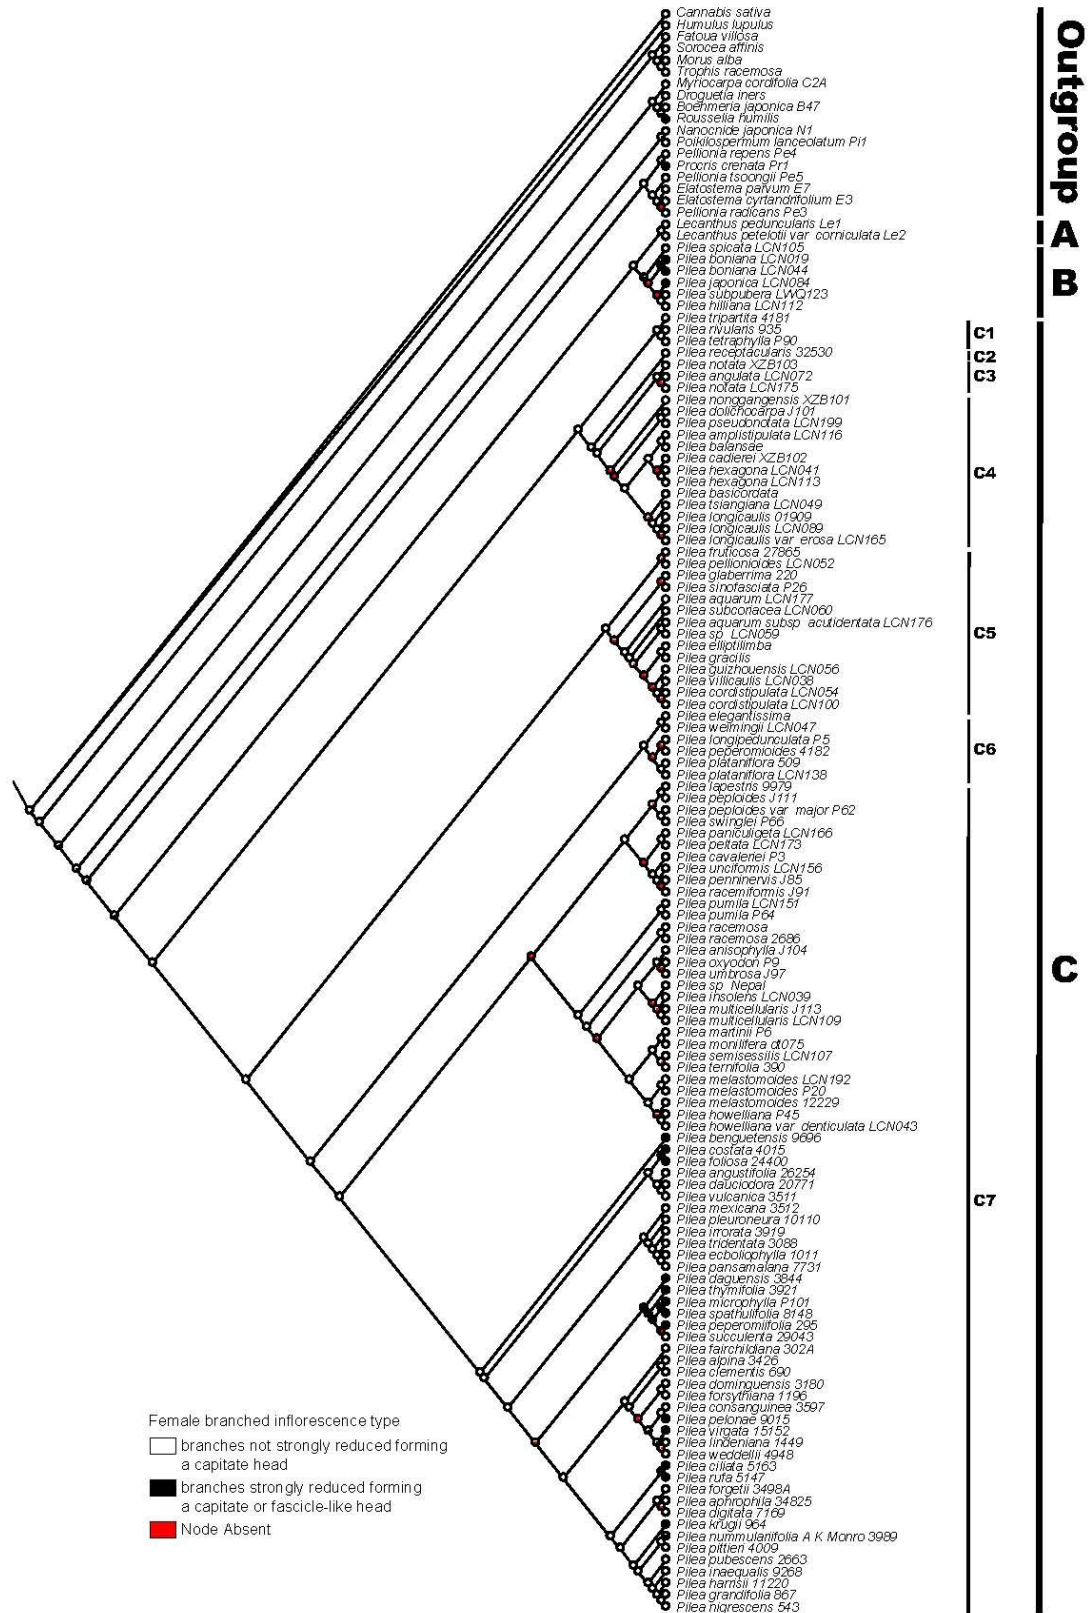

856

857 Fig. S18. Ancestral state reconstruction for *Pilea* based on Maximum likelihood analysis of female  
 858 branched inflorescence type.

859

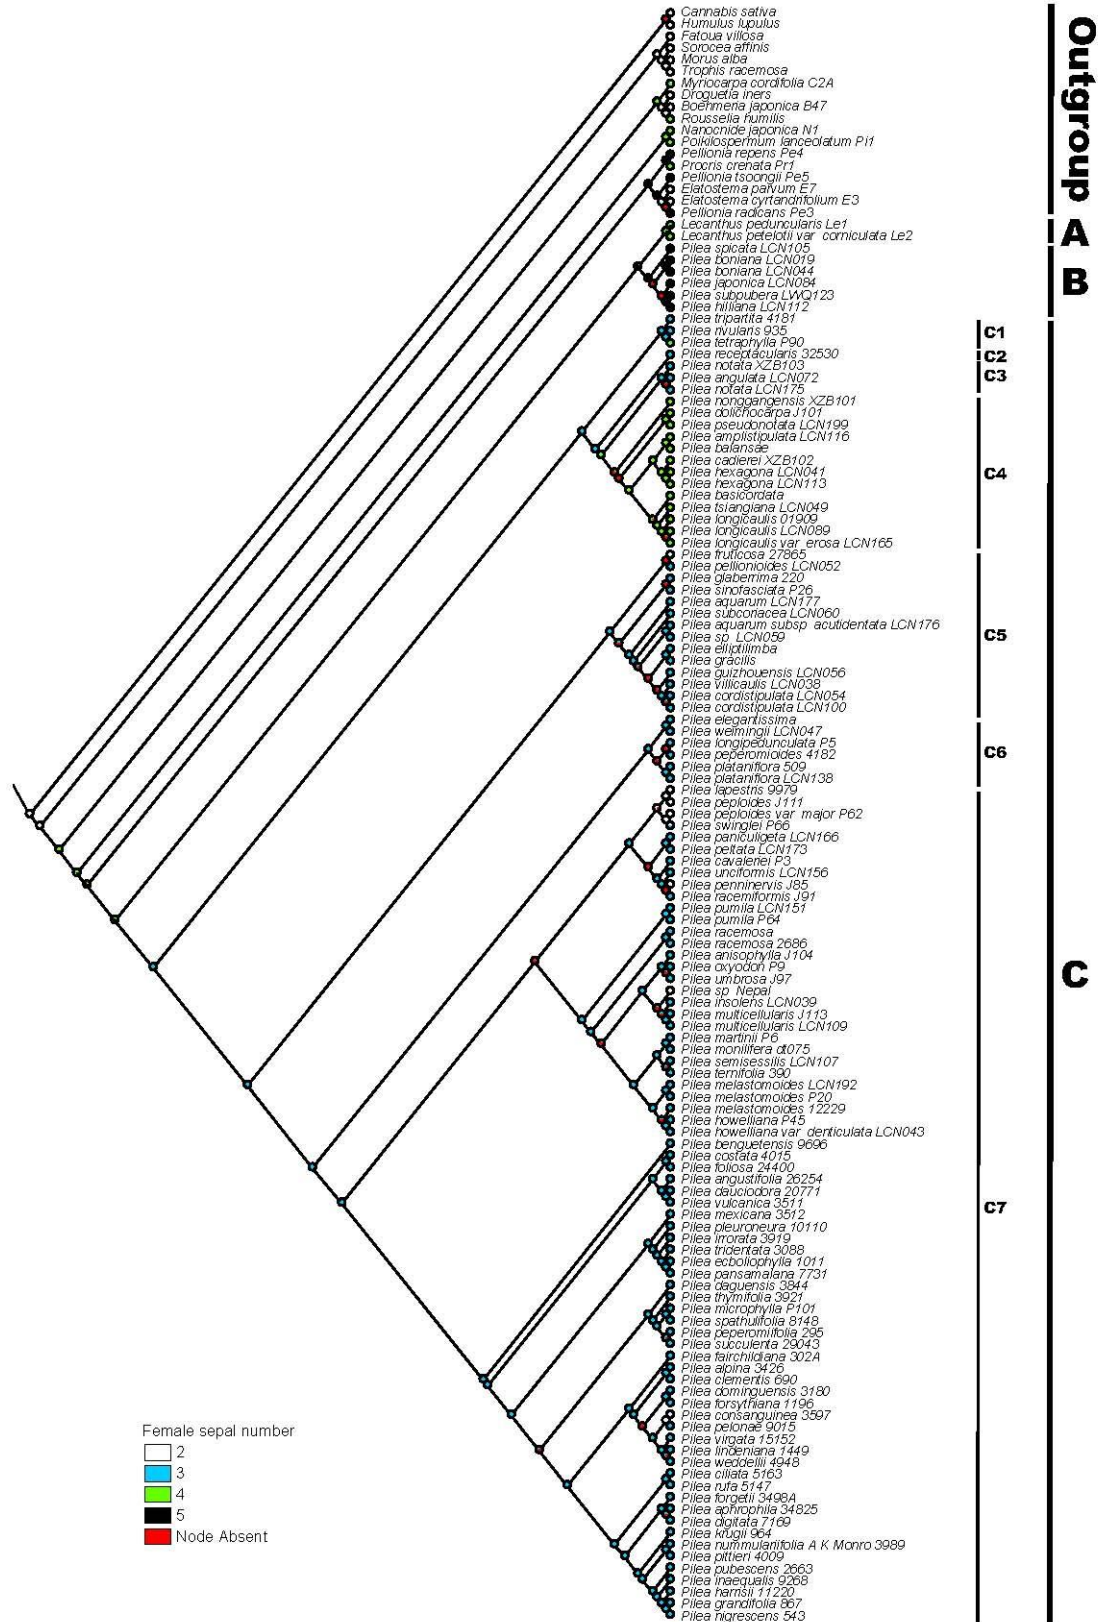

860

861 Fig. S19. Ancestral state reconstruction for *Pilea* based on Maximum likelihood analysis of female  
 862 sepal number.

863

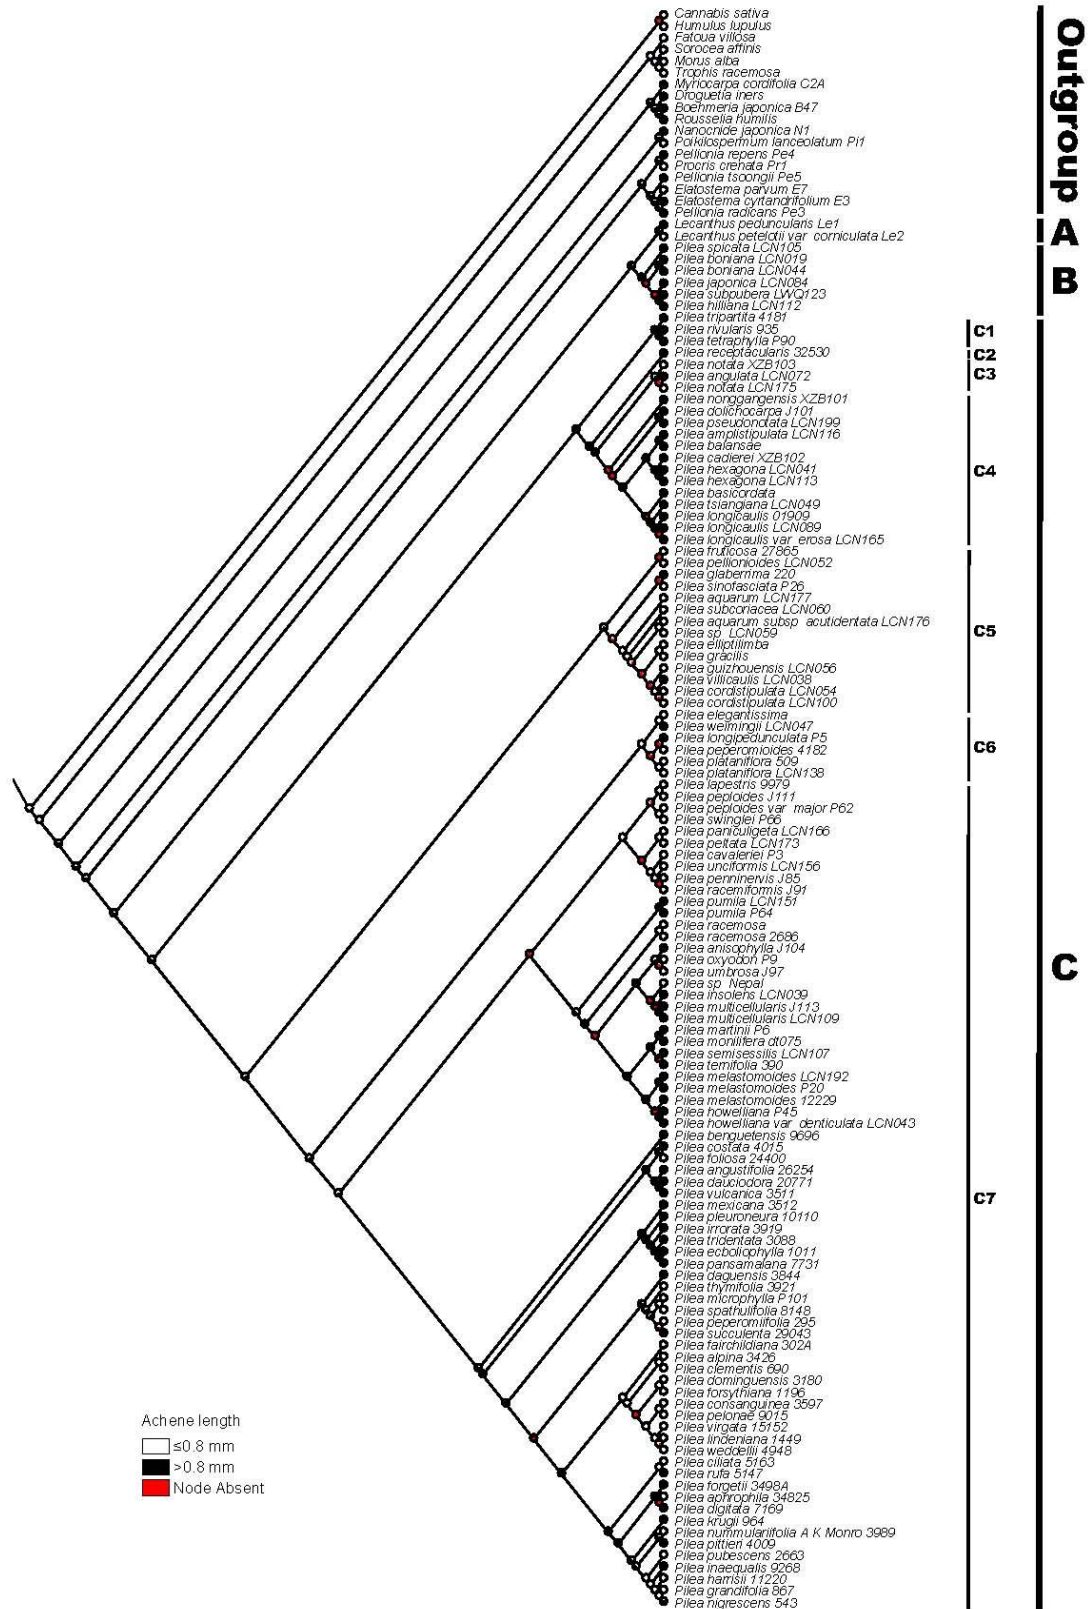

864

865 Fig. S20. Ancestral state reconstruction for *Pilea* based on Maximum likelihood analysis of  
 866 achene length.

867

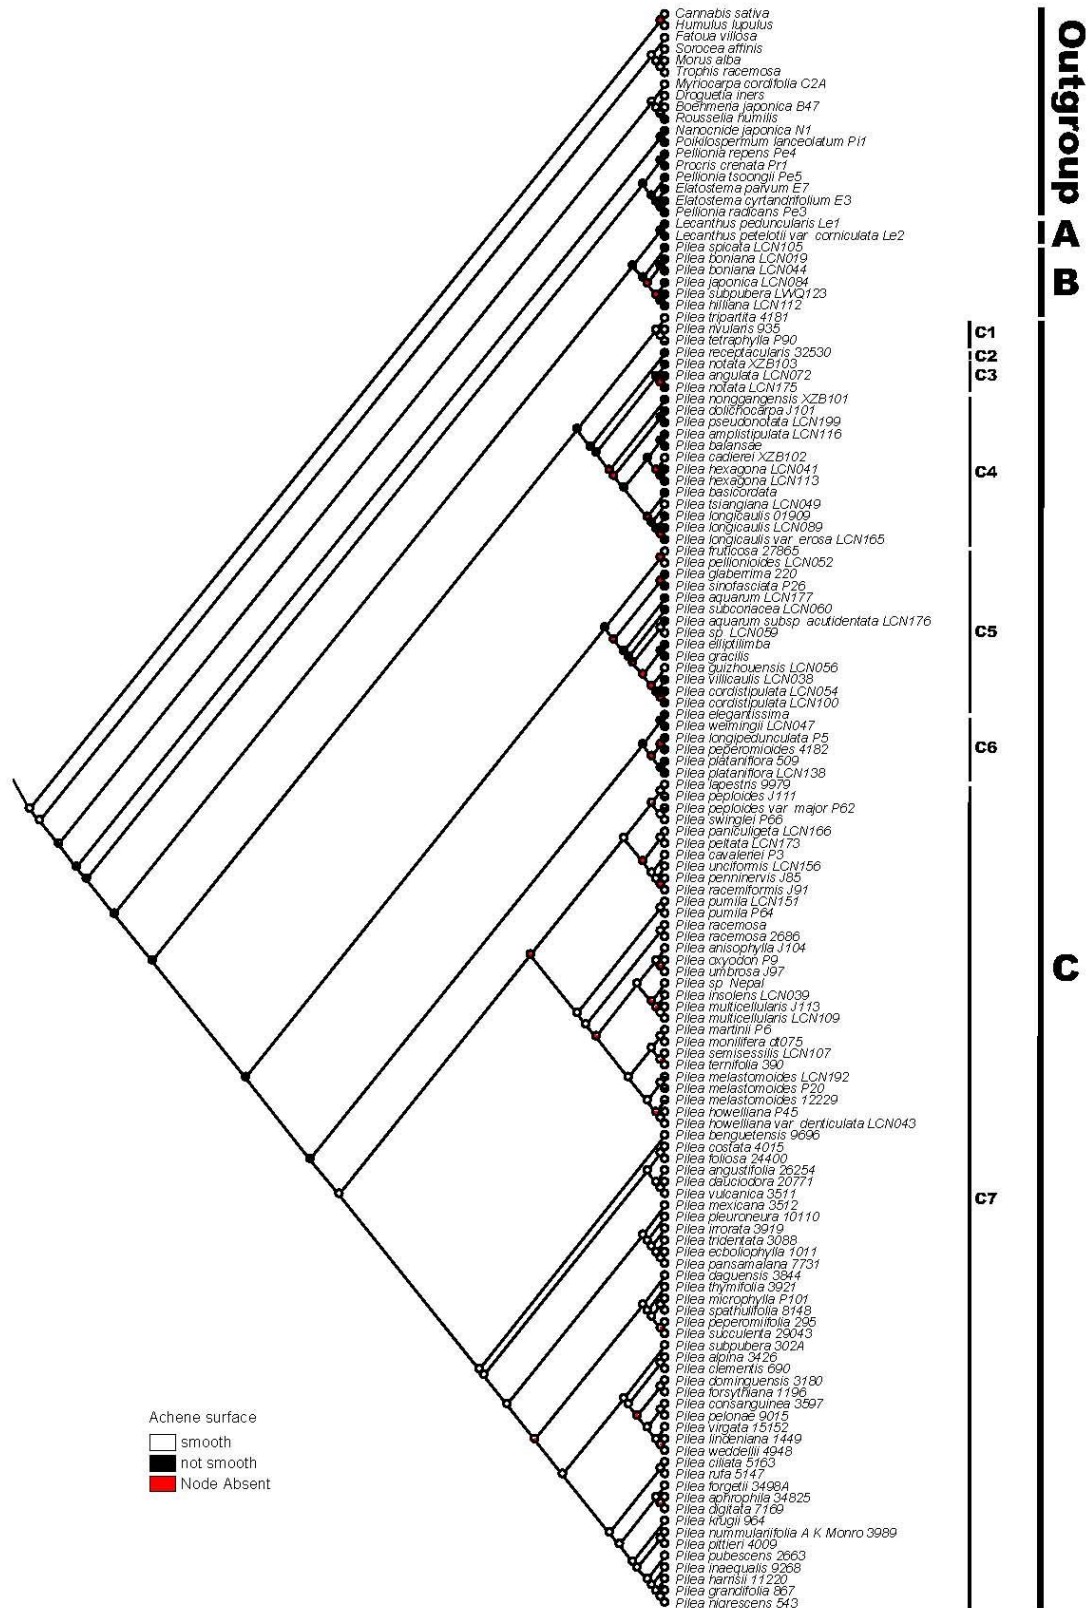

868

869 Fig. S21. Ancestral state reconstruction for *Pilea* based on Maximum likelihood analysis of  
 870 achene surface.

871

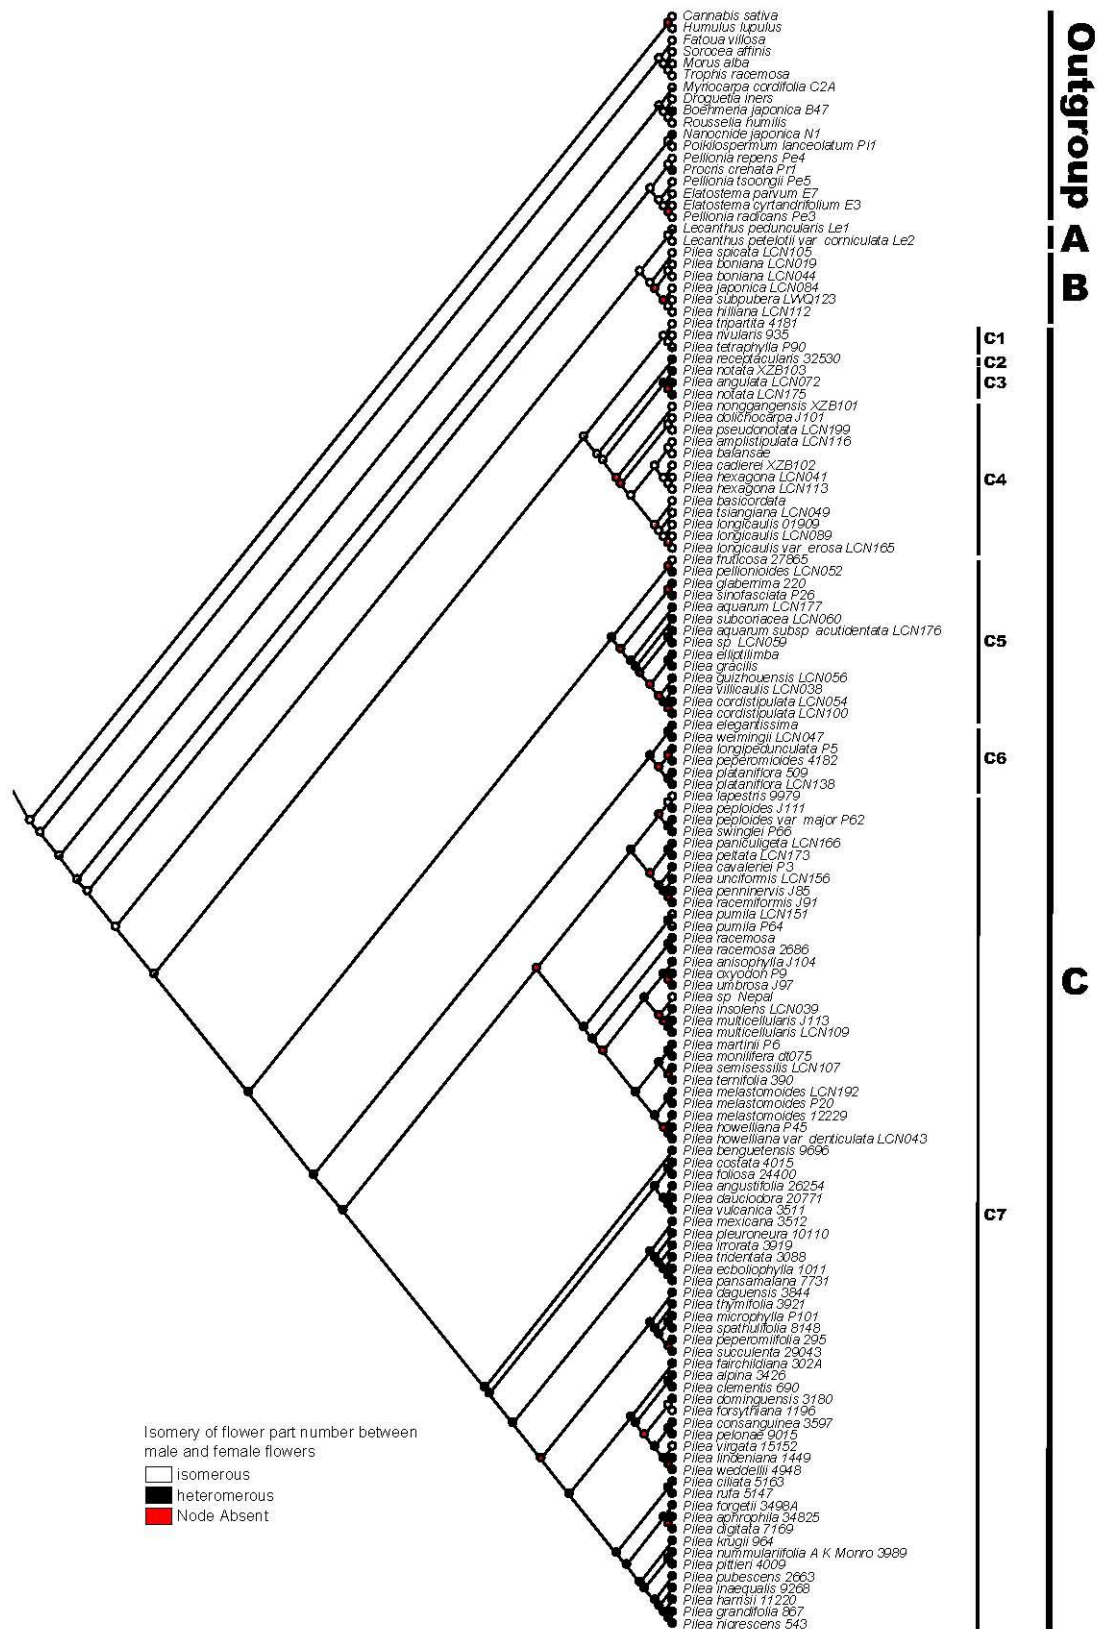

872

873 Fig. S22. Ancestral state reconstruction for *Pilea* based on Maximum likelihood analysis of  
 874 isomery of flower part number between male and female flowers.

875

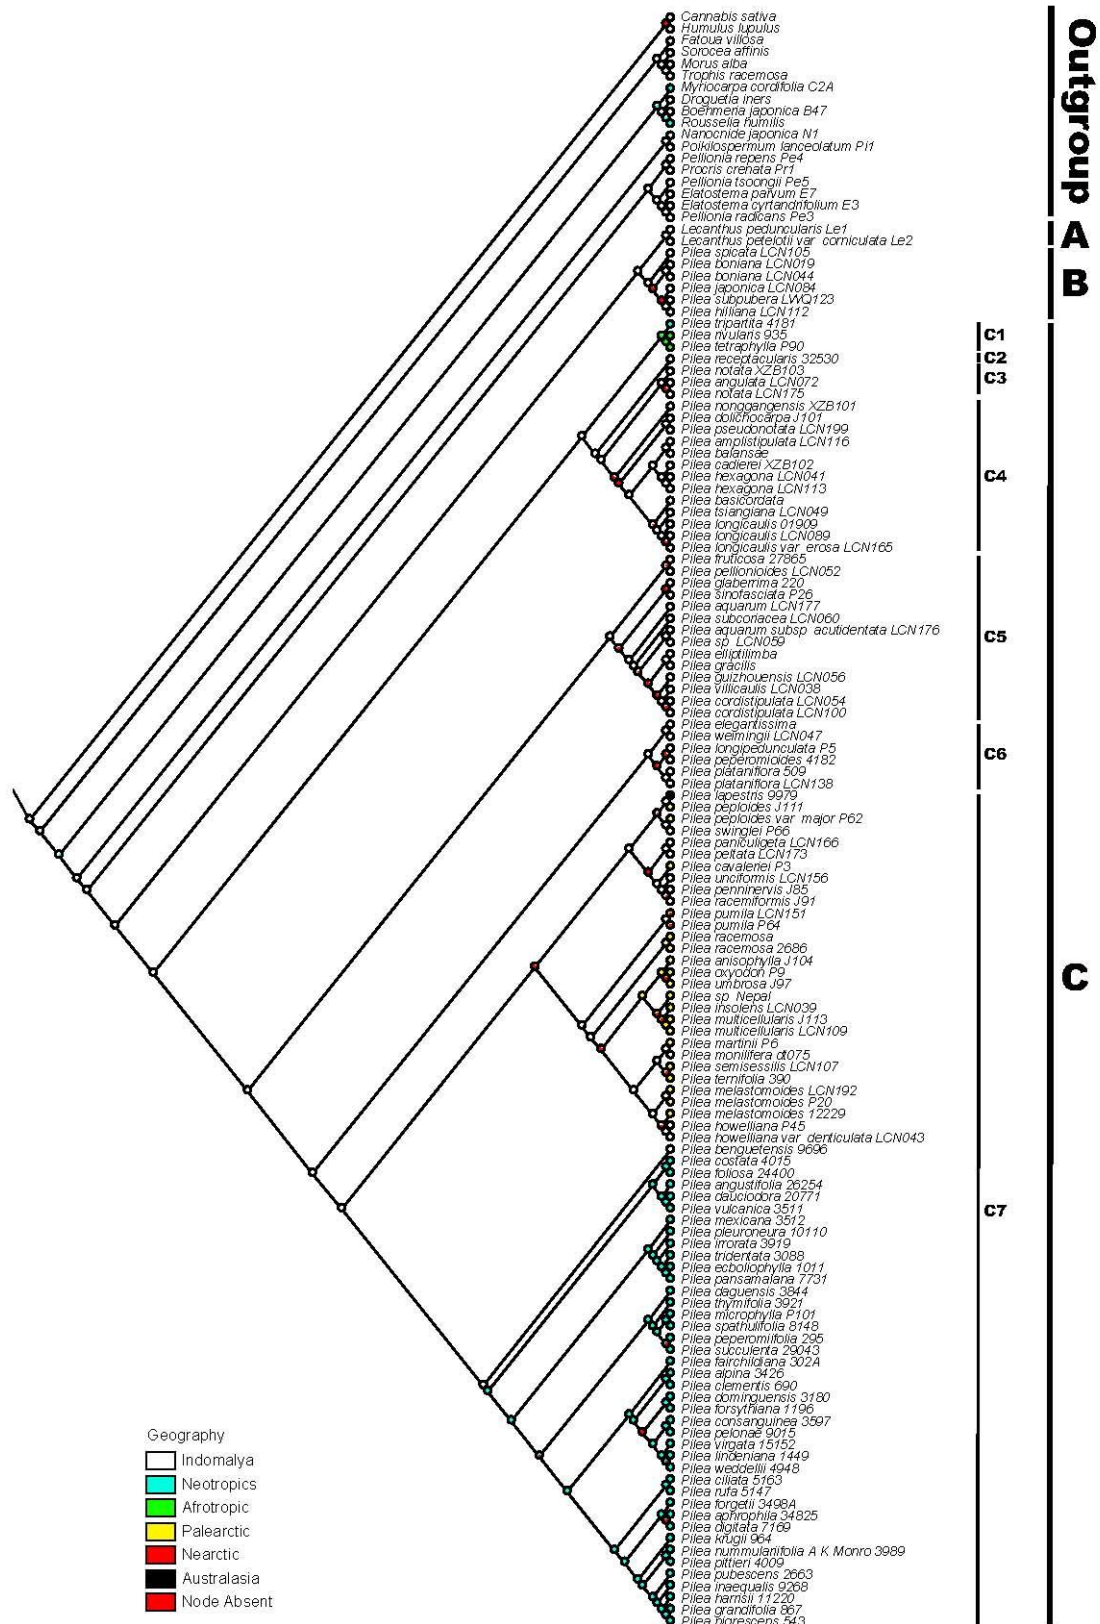

876

877 Fig. S23. Ancestral state reconstruction for *Pilea* based on Maximum likelihood analysis of  
 878 geography.

879

880

881 **Appendix A. Supplementary material**

882 Supplementary Text 1. Species names and GenBank accession numbers of DNA sequences  
883 used in this study

884 Voucher information for samples of which sequences are newly generated is given using the  
885 following format: Taxon name, collection locality, collector and collector number (herbarium  
886 for voucher specimen), GenBank accession numbers for ITS, *trnL-trnF*, *rbcL*, respectively.  
887 Samples downloaded from NCBI only remain Taxon name, collection locality, GenBank  
888 accession numbers as stated above. Herbaria: IBK = Guangxi Institute of Botany; K = Royal  
889 Botanic Garden, Kew; KUN = Kunming Institute of Botany, Chinese Academy of Sciences;  
890 SING = Singapore Botanic Gardens. (NA = not available, \* newly generated sequences).

891 Ingroup:

892 *Achudemia javanica*\_LWQ123, Indonesia, Robinson H.C. and Kloss C.B. 1914 (SING),  
893 MT516339\*, MT523094\*, MT523050\*. *Lecanthus peduncularis*\_Le1, China, KF137871,  
894 KF138350, KF138186. *Lecanthus petelotii* var *corniculate*\_Le2, China, KF137873,  
895 KF138352, KF138188. *Pilea alpina* 3426, Santo Domingo, DQ175543, DQ179309, NA.  
896 *Pilea amplistipulata*\_LCN116, China, Shui Y.M. et al.14319 (KUN), MT516340\*,  
897 MT523095\*, MT523051\*. *Pilea angulata*\_LCN072, China, Fu L.F. et al. FL0234 (IBK),  
898 MT516341\*, MT523096\*, MT523052\*. *Pilea angustifolia*\_26254, Costa Rica, DQ175556,  
899 DQ179289, NA. *Pilea anisophylla*\_J104, China, Wen F. WF182817-10 (IBK), MT516342\*,  
900 MT523097\*, MT523053\*. *Pilea aphrophila*\_34825, Colombia, DQ175589, DQ179323, NA.  
901 *Pilea aquarum*\_LCN177, China, Wei Y.G. Wei097 (IBK), MT516343\*, MT523098\*,  
902 MT523054\*. *Pilea aquarum* subsp. *acutidentata*\_LCN176, China, Wen F. WFLSH111207  
903 (IBK), MT516344\*, MT523099\*, MT523055\*. *Pilea balansae*, Vietnam, Huang S.L.  
904 HSL118-1 (IBK), MT516345\*, MT523100\*, NA. *Pilea basicordata*, China, DQ175614,  
905 DQ179361, NA. *Pilea benguetensis*\_9696, Phillipines, DQ175554, DQ179337, NA. *Pilea*  
906 *boniana*\_LCN019, China, Fu L.F. FLF180412-01, (IBK), MT516346\*, MT523101\*,  
907 MT523056\*. *Pilea boniana*\_LCN044, China, Qin et al. 3193 (KUN), MT516347\*,  
908 MT523102\*, MT523057\*. *Pilea cadierei*\_XZB102, China, Xin Z.B. XZB102 (IBK),  
909 MT516348\*, MT523103\*, MT523058\*. *Pilea cavaleriei*\_P3, China, KF137895, KF138380,  
910 KF138214. *Pilea ciliate*\_5163, Jamaica, DQ175538, DQ179300, NA. *Pilea clementis*\_690,



911 Cuba, DQ175550, DQ179310, NA. *Pilea consanguinea*\_3597, Santo Domingo, DQ175539,  
912 DQ179312, NA. *Pilea cordistipulata*\_LCN054, China, Monro et al. AM6727 (IBK),  
913 MT516349\*, MT523104\*, MT523059\*. *Pilea cordistipulata*\_LCN100, China, Huang S.L.  
914 HSL140 (IBK), MT516350\*, MT523105\*, MT523060\*. *Pilea costata*\_4015, Peru, DQ175595,  
915 DQ179290, NA. *Pilea daguensis*\_3844, Mexico, DQ175567, DQ179332, NA. *Pilea*  
916 *dauciodora*\_20771, Mexico, DQ175562, DQ176857, NA. *Pilea digitate*\_7169, Panama,  
917 DQ175559, DQ179326, NA. *Pilea dolichocarpa*\_J101, China, Monro A.K. AM6399 (IBK),  
918 MT516351\*, MT523106\*, MT523061\*. *Pilea dominguensis*\_3180, Santo Domingo,  
919 DQ175541, DQ179313, NA. *Pilea ecboliophylla*\_1011, Mexico, DQ175531, DQ179292, NA.  
920 *Pilea elegantissima*\_P39, China, MH357923, MH358303, MH358124. *Pilea elliptilimba*,  
921 China, Huang S.L. HSL113 (IBK), MT516352\*, MT523107\*, NA. *Pilea foliosa*\_24400, Peru,  
922 DQ175571, DQ179291, NA. *Pilea forgetii*\_3498A, Panama, DQ175585, DQ179333, NA.  
923 *Pilea forsythiana*\_1196, Dominica, DQ175546, DQ179311, NA. *Pilea fruticose*\_27865,  
924 Borneo, DQ175604, DQ179353, NA. *Pilea glaberrima*\_220, Nepal, DQ175600, DQ179352,  
925 NA. *Pilea gracilis*, China, Wei Y.G. Wei039 (IBK), MT516353\*, MT523108\*, NA. *Pilea*  
926 *grandifolia* 867, Jamaica, DQ175551, DQ179303, NA. *Pilea guizhouensis*\_LCN056, China,  
927 Monro et al. AM6715 (IBK), MT516354\*, MT523109\*, MT523062\*. *Pilea harrisii* 11220,  
928 Jamaica, DQ175537, DQ179302, NA. *Pilea hexagona*\_LCN041, China, Shui Y.M. YN004  
929 (KUN), MT516355\*, MT523110\*, MT523063\*. *Pilea hexagona*\_LCN113, China,  
930 Sino-Vietnamese expedition 775 (KUN), MT516356\*, MT523111\*, MT523064\*. *Pilea*  
931 *hilliana*\_LCN112, China, liuzu 2014 (KUN), MT516357\*, MT523112\*, MT523065\*. *Pilea*  
932 *howelliana* P45, China, MH357926, MH358306, MH358127. *Pilea howelliana* var.  
933 *denticulata*\_LCN043, China, Wang Y.Z. 4678 (KUN), MT516358\*, MT523113\*, MT523066\*.  
934 *Pilea inaequalis* 9268, Trinidad, DQ175552, DQ179304, NA. *Pilea insolens*\_LCN039, China,  
935 FLPH Tibet Expedition 12-1838 (IBK), MT516359\*, MT523114\*, MT523067\*. *Pilea irrorata*  
936 3919, Mexico, DQ175535, DQ179294, NA. *Pilea japonica*\_LCN084, China, Huang S.L.  
937 HSL012 (IBK), MT516360\*, MT523115\*, MT523068\*. *Pilea krugii* 964, Puerto Rico,  
938 DQ175581, DQ179315, NA. *Pilea lapestris* 9979, Indonesia, DQ175598, DQ179341, NA.  
939 *Pilea lindeniana* 1449, Cuba, DQ175547, DQ179314, NA. *Pilea longicaulis* 01909, China,  
940 DQ175611, DQ179363, NA. *Pilea longicaulis* var. *erosa*\_LCN165, China, Monro A.K.

941 AM6809 (IBK), MT516361\*, MT523116\*, NA. *Pilea longicaulis*\_LCN089, China, Huang  
942 S.L. HSL120 (IBK), MT516362\*, MT523117\*, MT523069\*. *Pilea longipedunculata*\_P5,  
943 China, KF137897, KF138382, KF138216. *Pilea martini*\_P6, China, KF137898, KF138383,  
944 KF138217. *Pilea melastomoides*\_12229, Indonesia, DQ175596, DQ179345, NA. *Pilea*  
945 *melastomoides*\_P20, China, KF137899, KF138384, KF138218. *Pilea*  
946 *melastomoides*\_LCN192, China, Huang S.L. HSL124 (IBK), MT516363\*, MT523118\*,  
947 MT523070\*. *Pilea Mexicana*\_3512, Panama, DQ175579, DQ179278, NA. *Pilea*  
948 *microphylla*\_P101, Brazil, MH357928, MH358307, MH358129. *Pilea monilifera*\_dt075,  
949 China, MK911055, MK911077, MK911100. *Pilea multicellularis*\_J113, China, Wen F.  
950 WF180817-08 (IBK), MT516364\*, MT523119\*, MT523071\*. *Pilea multicellularis*\_LCN109,  
951 China, Tibet Expedition 12-1247 (IBK), MT516365\*, MT523120\*, MT523072\*. *Pilea*  
952 *nigrescens*\_543, Jamaica, DQ175582, DQ179301, NA. *Pilea nonggangensis*\_XZB101, China,  
953 Huang S.L. HSL149 (IBK), MT516366\*, MT523121\*, MT523073\*. *Pilea notata*\_LCN175,  
954 China, Wen F. WFLSH120925 (IBK), MT516367\*, MT523122\*, MT523074\*. *Pilea*  
955 *notata*\_XZB103, China, Huang S.L. HSL099 (IBK), MT516368\*, MT523123\*, MT523075\*.  
956 *Pilea nummularifolia* A.K.Monro 3989, Peru, DQ175588., DQ179316, NA. *Pilea oxyodon* P9,  
957 China, KF137902, KF138387, KF138221. *Pilea paniculigera*\_LCN166, China, Monro A.K.  
958 AM6818 (IBK), MT516369\*, MT523124\*, MT523076\*. *Pilea pansamalana* 7731, Mexico,  
959 DQ175533, DQ179296, NA. *Pilea pellionioides*\_LCN052, China, Hu G.X. HGX001 (IBK),  
960 MT516370\*, MT523125\*, MT523077\*. *Pilea pelonae* 9015, Dominican, DQ175540,  
961 DQ179327, NA. *Pilea peltata*\_LCN173, China, Huang S.L. HSL116 (IBK), MT516371\*,  
962 MT523126\*, MT523078\*. *Pilea penninervis*\_J85, China, Wei Y.G. 0726 (IBK), MT516372\*,  
963 MT523127\*, MT523079\*. *Pilea peperomiifolia*\_295, Virgin Islands, DQ175569, DQ179281,  
964 NA. *Pilea peperomioides*\_4182, cultivated in UK, DQ175605, DQ179350, NA. *Pilea*  
965 *peploides* var. *major*\_P62, China, MH357931, NA, MH358132. *Pilea peploides*\_J111, China,  
966 Monro A.K. AM6433 (IBK), MT516373\*, MT523128\*, MT523080\*. *Pilea pittieri*\_4009, Peru,  
967 DQ175560, DQ179328, NA. *Pilea plataniflora*\_509, Japan, DQ175599, DQ179349, NA.  
968 *Pilea plataniflora*\_LCN138, China, Huang S.L. HSL018 (IBK), MT516374\*, MT523129\*,  
969 MT523081\*. *Pilea pleuroneura*\_10110, Guatemala, DQ175532, DQ179297, NA. *Pilea*  
970 *pseudonotata*\_LCN199, China, Wei Y.G. Wei047 (IBK), MT516375\*, MT523130\*,

971 MT523082\*. *Pilea pubescens*\_2663, Belize, DQ175558, DQ179325, NA. *Pilea pumila*\_P64,  
972 China, MH357932, MH358309, MH358133. *Pilea pumila*\_LCN151, China, Huang S.L.  
973 2104H (IBK), MT516376\*, MT523131\*, MT523083\*. *Pilea racemiformis*\_J91, China, Wen F.  
974 WF150423-33 (IBK), MT516377\*, MT523132\*, MT523084\*. *Pilea racemosa*, China,  
975 DQ175602, DQ179347, NA. *Pilea racemose*\_2686, China, DQ175602, DQ179347, NA.  
976 *Pilea receptacularis*\_32530, China, DQ175612, DQ179362, NA. *Pilea rivularis*\_935,  
977 Tanzania, DQ175606, DQ179358, NA. *Pilea rufa*\_5147, Jamaica, DQ175578, DQ179299,  
978 NA. *Pilea semisessilis*\_LCN107, China, Zhou Z.K. et al. EXLS-0272 (KUN), MT516378\*,  
979 MT523133\*, MT523085\*. *Pilea sinofasciata*\_P26, China, KF137905, KF138389, KF138224.  
980 *Pilea* sp. \_LCN059, China, Fu L.F. FLF180527-01 (IBK), MT516379\*, MT523134\*,  
981 MT523086\*. *Pilea* sp. \_Nepal, cultivated at RBGE, DQ175601, DQ179344, NA. *Pilea*  
982 *spathulifolia*\_8148, Dominican Republic, DQ175570, DQ179282, NA. *Pilea*  
983 *spicata*\_LCN105, China, Burkill H. 37636, (K), MT516380\*, MT523135\*, MT523087\*. *Pilea*  
984 *subcoriacea*\_LCN060, China, Wei Y.G. WYG180519-02 (IBK), MT516381\*, MT523136\*,  
985 MT523088\*. *Pilea succulenta*\_29043, Cayman Islands, DQ175565, DQ179280, NA. *Pilea*  
986 *swinglei*\_P66, China, MH357933, NA, MH358134. *Pilea ternifolia*\_390, Nepal, DQ175597,  
987 DQ179346, NA. *Pilea tetraphylla*\_P90, Madagascar, MH357934, MH358310, MH358135.  
988 *Pilea thymifolia*\_3921, Peru, DQ175568, DQ179283, NA. *Pilea tridentata*\_3088, Mexico,  
989 DQ175536, DQ179293, NA. *Pilea tripartita*\_4181, Panama, DQ175617, DQ176859, NA.  
990 *Pilea tsiangiana*\_LCN049, China, Monro A.K. AM6770 (IBK), MT516382\*, MT523137\*,  
991 MT523089\*. *Pilea umbrosa*\_J97, China, Wen F. WF180821-01 (IBK), MT516383\*,  
992 MT523138\*, MT523090\*. *Pilea unciformis*\_LCN156, China, Huang S.L. HSL132 (IBK),  
993 MT516384\*, MT523139\*, MT523091\*. *Pilea villicaulis*\_LCN038, China, Shui et al. 12871  
994 (KUN), MT516385\*, MT523140\*, MT523092\*. *Pilea virgata*\_15152, Jamaica, DQ175548,  
995 DQ179329, NA. *Pilea vulcanica*\_3511, Panama, DQ175563, DQ179284, NA. *Pilea*  
996 *weddellii*\_4948, Jamaica, DQ175545, DQ179308, NA. *Pilea weimingii*\_LCN047, China, Lv  
997 R.D. LRD001 (IBK), MT516386\*, MT523141\*, MT523093\*. *Pilea fairchildiana*\_302A,  
998 Dominica, JN252482, JN252481, NA.  
999 Outgroup:  
1000 *Boehmeria japonica*\_B47, USA, KF137808, KF138279, KF138116. *Cannabis sativa*\_Z1773,

1001 China, MH357863, NA, MH358052. *Droguetia iners*\_Dr1, China, KF137844, KF138318,  
1002 KF138154. *Elatostema cyrtandrifolium*\_E3, China, KF137848, KF138322, KF138158.  
1003 *Elatostema parvum*\_E7, China, KF137852, KF138326, KF138162. *Fatoua villosa*\_F1, China,  
1004 KF137858, KF138331, KF138168 . *Humulus lupulus*\_D3848, China, MH357893, NA,  
1005 MH358086. *Morus alba*, HM747164, HM747180, L01933. *Myriocarpa cordifolia*\_C2A,  
1006 Panama, KF137877, KF138357, KF138193. *Nanocnide japonica*\_N1, China, KF137879,  
1007 KF138359, KF138194. *Pellionia radicans*\_Pe3, China, KF137891, KF138375, KF138210.  
1008 *Pellionia repens*\_Pe4, China, KF137892, KF138376, KF138211. *Pellionia tsoongii*\_Pe5,  
1009 China, KF137893, KF138377, KF138212. *Procris crenata*\_Pr1, China, KF137922,  
1010 KF138407, KF138242. *Sorocea affinis*, HM747179, HM747195, GQ981880. *Trophis*  
1011 *racemosa*, HM747178, HM747194, GQ981908. *Poikilospermum lanceolatum*\_Pi1, China,  
1012 KF137912, KF138396, KF138231. *Rousselia humilis*, Dominica, KM586474, KM586646,  
1013 KM586560.  
1014
